# Supplementary material for: Bimetallic Pd/Cu complexes of pyridylchalcogenolates and their catalytic activity in the Sonogashira reaction
Source: Royal Society of Chemistry journal article supplement (doi:10.1039/d4nj02694b), 2024-01-01
Supplement: d4nj02694b1.pdf [file d4nj02694b1.pdf]

## *Supplementary Information*

### **Bimetallic Pd/Cu complexes of pyridylchalcogenolates and catalytic activity in Sonogashira reaction**

M. K. Pal<sup>a</sup>, A. P. Wadawale<sup>a</sup> and S. Dey<sup>a,b,\*</sup>

<sup>a</sup> Chemistry Division, Bhabha Atomic Research Centre, Mumbai 400 085, India

<sup>b</sup> Homi Bhabha National Institute, Training School Complex, Mumbai-400094, India

\* *E-mail:* [dsandip@barc.gov.in](mailto:dsandip@barc.gov.in) (S. Dey); *Tel:* +91-22-2559-2589

#### **Materials and methods**

All experiments were carried out under a nitrogen atmosphere by using standard Schlenk technique. Solvents used in the reactions were degassed with nitrogen and distilled using standard procedures. The 4,4'-dipyridyldisulfide (4,4'-py<sub>2</sub>S<sub>2</sub>) was used as purchased from commercial sources without further purification. The ligand 4,4'-dipyridyldiselenide (4,4'-py<sub>2</sub>Se<sub>2</sub>)<sup>1</sup> and the complexes [PdCl(4-Sepy)]<sub>n</sub> and [PdCl(PPh<sub>3</sub>)<sub>2</sub>(4-Sepy)] were prepared by literature methods.<sup>2</sup> Melting points were determined in capillary tubes and are uncorrected. Elemental analyses were carried out on a Thermo Fischer Flash EA1112 CHNS analyzer. <sup>1</sup>H NMR spectra were recorded on a Bruker NMR spectrometers operating at 300 MHz, chemical shifts are relative to internal chloroform-*d*<sub>1</sub> peak (δ 7.26). For <sup>31</sup>P{<sup>1</sup>H} NMR spectra were recorded on NMR spectrometer operating at 121.5 MHz. Mass spectra were recorded on a maXis Impact (Bruker) mass spectrometer. Thermo gravimetric analyses (TGA) were carried out on a Nitzsch STA 409 PC-Luxx TG-DTA instrument, which was calibrated with CaC<sub>2</sub>O<sub>4</sub>·H<sub>2</sub>O. The TG curves were recorded at a heating rate of 10 °C min<sup>-1</sup> under a flow of argon. ESCA apparatus (SPECS GmbH) with an Al-K<sub>α</sub> (1486.6 eV) X-ray Source was

deployed for XPS measurements. The binding energy was calibrated using Au-4f<sub>7/2</sub> line (83.95 eV) and corrected using C 1 s line (284.5 eV) from adventitious aliphatic carbon.

### Synthesis of complexes:

#### [{PdCl(4-Spy)}]<sub>n</sub>

A methanolic solution (10 mL) of Na<sub>2</sub>PdCl<sub>4</sub> (395 mg, 1.34 mmol) was added to a freshly prepared methanolic solution (15 mL) of Na(4-SC<sub>5</sub>H<sub>4</sub>N) (prepared from 4,4'-(C<sub>5</sub>H<sub>4</sub>N)<sub>2</sub>S<sub>2</sub> (148 mg, 0.67 mmol) and NaBH<sub>4</sub> (51 mg, 1.35 mmol)) with stirring which continued for 6 h at room temperature afforded a dark brown precipitate. The brown precipitate was filtered through a G3 assembly and washed with water, acetone and diethyl ether and dried in vacuo (320 mg, 95%). M.p. >200 °C. Anal. Calcd for C<sub>5</sub>H<sub>4</sub>NPdCl: C, 23.83; H, 1.60; N, 5.56; Found: C, 23.94; H, 1.69; N, 5.31.

#### [{PdCl(PPh<sub>3</sub>)<sub>2</sub>(4-Spy)] (1a)

To dichloromethane suspension (20 mL) of [PdCl(4-Spy)]<sub>n</sub> (188.8 mg, 0.085 mmol), solid PPh<sub>3</sub> (393.0 mg, 1.498 mmol) was added with stirring. The dark-red solution was stirred for 6 h at room temperature. The solvents were evaporated using vacuum, the brown residue was washed with diethyl ether, extracted with acetone (3 × 6 mL) and filtered. The filtrate was concentrated to 10 mL and kept in refrigerator to yield red crystals of the title complex (442.0 mg, 76 %), m.p. 156 °C. Anal. Calcd for C<sub>41</sub>H<sub>34</sub>ClNP<sub>2</sub>PdS: C, 63.41; H, 4.41; N, 1.80; Found: C, 63.52; H, 4.29; N, 1.67%. <sup>1</sup>H NMR (CDCl<sub>3</sub>): δ 7.66–7.60 (m, 14H, *o*-H, Ph and 2,6-H, py), 7.39–7.31 (m, 18H, *m/p*-H, Ph), 6.87 (br, 2H, 3,5-H, py); <sup>31</sup>P {<sup>1</sup>H} NMR (CDCl<sub>3</sub>): δ 24.7 (s). Small amount of PPh<sub>3</sub> (δ -5.8) and OPPh<sub>3</sub> (δ 29.2) existed in solution.

#### [{Pd(PPh<sub>3</sub>)<sub>2</sub>(4-Spy)}<sub>2</sub>] (2a)

To methanolic solution (20 mL) of Na(4-SC<sub>5</sub>H<sub>4</sub>N) (prepared from 4,4'-(C<sub>5</sub>H<sub>4</sub>N)<sub>2</sub>S<sub>2</sub> (72.6 mg, 0.33 mmol) and NaBH<sub>4</sub> (24.9 mg, 0.66 mmol)), solid Pd(PPh<sub>3</sub>)<sub>2</sub>Cl<sub>2</sub> (231.3 mg, 0.33 mmol) was

added with stirring. The orange coloured suspension was stirred for 3 h at room temperature. The whole reaction mixture was filtered through G-3 filtering assembly and the orange residue obtained was washed with hexane and diethyl ether ( $3 \times 6$  mL) to yield title complex (220.0 mg, 78 %), m.p. 182 °C. The product was recrystallized from methanol solvent to get red crystals.  $^1\text{H}$  NMR ( $\text{CDCl}_3$ ):  $\delta$  8.16 (d, 4.1Hz, 2H, py), 7.83 (d, 5.5 Hz, 2H, py), 7.67 (d, 5.5Hz, 2H, py), 7.60–7.53 (m, 26H, *o*-H, Ph and py), 7.38–7.19 (m, 38H, *m/p*-H, Ph and py), 6.97 (d, 5.4Hz, 2H, py), 6.83 (d, 5.7Hz, 2H, py), 6.75 (d, 5.5Hz, 2H, py);  $^{31}\text{P}\{^1\text{H}\}$  NMR ( $\text{CDCl}_3$ ):  $\delta$  33.7 (s, dimeric complex), 25.1 (s, monomeric complex). Small amount of free  $\text{PPh}_3$  ( $\delta$  -5.4) existed in solution.

#### **General experimental procedure for the catalysis reaction:**

In an oven dried 25 ml Schlenk flask, a mixture of aryl halide (1 mmol), phenylacetylene (1.2 mmol), Pd catalyst (0.1 mol%), Base (2 mmol) in 3 ml DMA was heated in an oil bath at 120 °C for 15 h with continuous stirring. After 15 h the reaction mixture was cooled to room temperature and the product was extracted with ethyl acetate (3 x 5 ml). After drying over  $\text{Na}_2\text{SO}_4$ , the solvent was removed under vacuum, and the resulting crude product was purified by column chromatography on silica gel.

#### **X-ray Crystallography**

A Rigaku-Oxford make XtaLAB Synergy, Dualflex X-ray diffractometer was employed for crystal screening, unit cell determination, and data collection. The goniometer was controlled using the APEX3 software suite.<sup>3</sup> The X-ray radiation employed was generated from a Cu X-ray tube  $\text{K}\alpha$  ( $\lambda = 1.54184 \text{ \AA}$ ). Integrated intensity information for each reflection was obtained by reduction of the data frames with the program APEX3.<sup>3</sup> The integration method employed a three-dimensional profiling algorithm and all data were corrected for Lorentz and polarization

factors, as well as for crystal decay effects. Finally, the data was merged and scaled to produce a suitable data set. The absorption correction program SADABS<sup>4</sup> was employed to correct the data for absorption effects. Systematic reflection conditions and statistical tests of the data suggested the space group *Cc*. A solution was obtained readily using XT/XS in APEX3.<sup>3,5</sup> Hydrogen atoms were placed in idealized positions and were set riding on the respective parent atoms. All non-hydrogen atoms were refined with anisotropic thermal parameters. The structure was refined (weighted least squares refinement on  $F^2$ ) to convergence.<sup>5,6</sup> Olex2 was employed for the final data presentation and structure plots.<sup>6</sup>

### References:

1. B. Boduszek and R. Gancarz, *J. Prakt. Chem.*, 1996, **338**, 186–189.
2. K. V. Vivekananda, S. Dey, A. Wadawale, N. Bhuvanesh, V. K. Jain, *Dalton Trans.*, 2013, **42**, 14158.
3. APEX3 “Program for Data Collection on Area Detectors” BRUKER AXS Inc., 5465 East Cheryl Parkway, Madison, WI 53711–5373 USA.
4. G. M. Sheldrick, SADABS, “Program for Absorption Correction of Area Detector Frames”, BRUKER AXS Inc., 5465 East Cheryl Parkway, Madison, WI 53711–5373 USA.
5. (a) G. M. Sheldrick, *Acta Cryst.*, 2008, **A64**, 112–122. (b) G. M. Sheldrick, *Acta Cryst.*, 2015, **A71**, 3–8. (c) G. M. Sheldrick, *Acta Cryst.*, 2015, **C71**, 3–8. XT, XS, BRUKER AXS Inc., 5465 East Cheryl Parkway, Madison, WI 53711–5373 USA.
6. O. V. Dolomanov, L. J. Bourhis, R. J. Gildea, J. A. K. Howard and H. Puschmann, “OLEX2: A Complete Structure Solution, Refinement and Analysis Program”, *J. Appl. Cryst.*, 2009, **42**, 339–341.

**Table S1** Mass data for [ $\{\text{Pd}(\text{PPh}_3)_2(4\text{-Spy})_2\}\{\text{Cu}(\text{PPh}_3)_2\text{Cl}\}_2$ ] (**3**).

| Mass fragments of complex <b>3</b>                                                                                                | Isotopic mass, $m/z$ | Calculated peak of the most abundant ion | Experimental peak of the most abundant ion |
|-----------------------------------------------------------------------------------------------------------------------------------|----------------------|------------------------------------------|--------------------------------------------|
| $([\text{M} + \text{CH}_3\text{CN} - (2\text{Cl} + \text{PPh}_3 + 2\text{py})]^+, 56\%)$                                          | 1729.24              | 1731.26                                  | 1731.09                                    |
| $([\text{M} + \text{Na} + \text{CH}_3\text{CN} - 9\text{Ph}]^+, 98\%)$                                                            | 1464.92              | 1468.95                                  | 1468.99                                    |
| $([\text{M} + \text{CH}_3\text{CN} - (\text{Cl} + 9\text{Ph})]^+, 81\%)$                                                          | 1406.97              | 1408.99                                  | 1408.99                                    |
| $([\text{M} + \text{H} - (\text{Cl} + 9\text{Ph})]^+, 100\%)$                                                                     | 1366.95              | 1368.97                                  | 1369.10                                    |
| $([\text{M} + \text{Na} + 2\text{CH}_3\text{CN} - (\text{CuCl}(\text{PPh}_3)_2 + \text{Cl} + \text{Spy} + 2\text{Ph})]^+, 100\%)$ | 1278.17              | 1280.18                                  | 1280.17                                    |
| $([\text{M} - (2\text{Cl} + 2\text{PPh}_3 + 3\text{Ph})]^+, 74\%)$                                                                | 1269.03              | 1271.04                                  | 1271.21                                    |

**Table S2** Mass data for [ $\{\text{Pd}(\text{PPh}_3)_2(4\text{-Sepy})_2\}\{\text{Cu}(\text{PPh}_3)_2\text{Cl}\}_2$ ] (**4**).

| Mass fragments of complex <b>4</b>                                               | Isotopic mass, $m/z$ | Calculated peak of the most abundant ion | Experimental peak of the most abundant ion |
|----------------------------------------------------------------------------------|----------------------|------------------------------------------|--------------------------------------------|
| $([\text{M} - (\text{PPh}_3 + 4\text{Ph})]^+, 59\%)$                             | 1619.90              | 1621.93                                  | 1622.03                                    |
| $([\text{M} + \text{H} - (\text{CuCl}(\text{PPh}_3)_2 + \text{Ph})]^+, 37\%)$    | 1492.04              | 1492.06                                  | 1492.08                                    |
| $([\text{M} + \text{Na} - (\text{CuCl}(\text{PPh}_3)_2 + 3\text{Ph})]^+, 100\%)$ | 1359.94              | 1359.96                                  | 1359.94                                    |

**Table S3:** Optimization of reaction parameters<sup>a</sup>.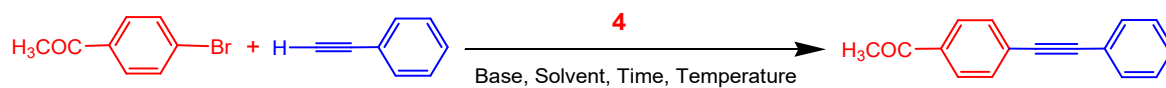

| Entry                     | Base                            | Catalyst | Solvent                    | Time (h) | Temp. (°C) | Yield (%) |
|---------------------------|---------------------------------|----------|----------------------------|----------|------------|-----------|
| <b>Effect of Base:</b>    |                                 |          |                            |          |            |           |
| 1                         | Cs <sub>2</sub> CO <sub>3</sub> | <b>4</b> | DMSO                       | 15       | 120        | 30        |
| 2                         | Et <sub>3</sub> N               | <b>4</b> | DMSO                       | 15       | 120        | -         |
| 3                         | K <sub>2</sub> CO <sub>3</sub>  | <b>4</b> | DMSO                       | 15       | 120        | 70        |
| <b>Effect of solvent:</b> |                                 |          |                            |          |            |           |
| 4                         | K <sub>2</sub> CO <sub>3</sub>  | <b>4</b> | DMSO                       | 15       | 120        | 70        |
| 5                         | K <sub>2</sub> CO <sub>3</sub>  | <b>4</b> | dioxane                    | 15       | reflux     | -         |
| 6                         | K <sub>2</sub> CO <sub>3</sub>  | <b>4</b> | methanol                   | 15       | reflux     | -         |
| 7                         | K <sub>2</sub> CO <sub>3</sub>  | <b>4</b> | 1,2-Dimethoxy ethane (DME) | 15       | reflux     | -         |
| 8                         | K <sub>2</sub> CO <sub>3</sub>  | <b>4</b> | DMF                        | 15       | 120        | 40        |
| 9                         | K <sub>2</sub> CO <sub>3</sub>  | <b>4</b> | Dimethyl acetamide (DMA)   | 15       | 120        | 80        |
| <b>Effect of time:</b>    |                                 |          |                            |          |            |           |
| 10                        | K <sub>2</sub> CO <sub>3</sub>  | <b>4</b> | DMA                        | 3        | 120        | 19        |
| 11                        | K <sub>2</sub> CO <sub>3</sub>  | <b>4</b> | DMA                        | 6        | 120        | 38        |
| 12                        | K <sub>2</sub> CO <sub>3</sub>  | <b>4</b> | DMA                        | 10       | 120        | 57        |
| 13                        | K <sub>2</sub> CO <sub>3</sub>  | <b>4</b> | DMA                        | 12       | 120        | 69        |
| 14                        | K <sub>2</sub> CO <sub>3</sub>  | <b>4</b> | DMA                        | 15       | 120        | 80        |
| 15                        | K <sub>2</sub> CO <sub>3</sub>  | <b>4</b> | DMA                        | 20       | 120        | 80        |

<sup>a</sup> Reaction conditions: 4-bromoacetophenone (1 mmol), phenyl acetylene (1.2 mmol), base (2 mmol), catalyst **4** (0.1 mol % of Pd).

**Table S4.** Comparison of the results reported for different Pd-based heterobimetallic catalysts in the Sonogashira coupling reaction.

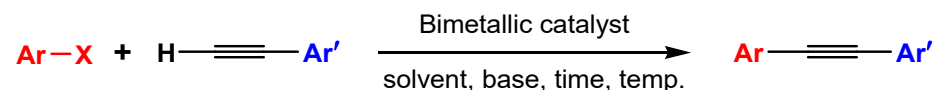

| Entry | Ar-X                                                                              | Ar'               | Catalyst                                                                                                                        | mol% of "Pd" | Reaction conditions                               | % yield         | Refs.     |
|-------|-----------------------------------------------------------------------------------|-------------------|---------------------------------------------------------------------------------------------------------------------------------|--------------|---------------------------------------------------|-----------------|-----------|
| 1     | PhBr                                                                              | Ph                | <b>MnPdL3</b> complex (L3 = pyridine-hydrazone-pyrimidine-hydrazone-phosphane scaffolds)                                        | 6            | CH <sub>3</sub> CN, DABCO, 90 °C, 24h             | 59              | 38        |
| 2     | PhBr                                                                              | Ph                | <b>CoPdL3</b> complex                                                                                                           | 6            | CH <sub>3</sub> CN, DABCO, 90 °C, 4h              | 99              | 38        |
| 3     | 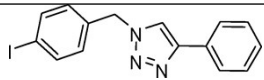 | Ph                | <b>[PdCuL<sub>2</sub>](PF<sub>6</sub>)<sub>3</sub></b> (L = 3-(1,10-phenanthrolin-2-yl)-1-(pyridin-2-ylmethyl)imidazolyli-dene) | 0.01         | DMF, pyrrolidine, 80 °C, 2h                       | 86              | 39        |
| 4     | 4-CH <sub>3</sub> COC <sub>6</sub> H <sub>4</sub> Br                              | Ph                | <b>Pd<sup>II</sup>/Ir<sup>III</sup></b> complex based on naphthalene and triazolyli-dene                                        | 1.0          | DMF, KO <sup>t</sup> Bu, 100 °C, 4h               | 75 <sup>a</sup> | 40        |
| 5     | PhI                                                                               | Ph                | <b>Pd<sup>II</sup>/Cu<sup>I</sup>-polymer complex</b> based on polyamic acid with biquinolyl group                              | 0.1          | NMP, Bu <sub>3</sub> N, 100 °C, 5h                | 88              | 41        |
| 6     | 4-MeC <sub>6</sub> H <sub>4</sub> Br                                              | Ph                | <b>PdCu NPs supported on MgO</b>                                                                                                | 0.02         | DMF, DABCO, 80 °C, 24h                            | 83              | 42        |
| 7     | PhI                                                                               | SiMe <sub>3</sub> | <b>Pd-Cu/C</b>                                                                                                                  | 10           | MeOH, Et <sub>2</sub> NH, 120 °C, 20 min          | 70              | 43        |
| 8     | PhI                                                                               | Ph                | <b>Pd@HKUST-1@Cu<sup>II</sup>/CMC</b> (CMC = carboxymethylcellulose)                                                            | 0.42         | DMSO, K <sub>2</sub> CO <sub>3</sub> , 90 °C, 6h  | 96              | 44        |
| 9     | PhI                                                                               | Ph                | <b>Cu/Pd@Mod-PANI-3OH</b> (PANI = polyaniline)                                                                                  | 0.09         | H <sub>2</sub> O, Et <sub>3</sub> N, 80 °C, 24h   | 92              | 45        |
| 10    | PhI                                                                               | Ph                | <b>Pd/Cu@MCC-PAMAMG2.5-PEI</b> (PAMAM = polyamidoamine; MCC = Microcrystalline cellulose)                                       | 0.65         | DMSO, K <sub>2</sub> CO <sub>3</sub> , 100 °C, 4h | 96              | 46        |
| 11    | 4-CH <sub>3</sub> COC <sub>6</sub> H <sub>4</sub> Br                              | Ph                | [{Pd(PPh <sub>3</sub> ) <sub>2</sub> (4-Sepy) <sub>2</sub> } {Cu(PPh <sub>3</sub> ) <sub>2</sub> Cl} <sub>2</sub> ]             | 0.1          | DMA, K <sub>2</sub> CO <sub>3</sub> , 120 °C, 15h | 80              | this work |

<sup>a</sup>PPh<sub>3</sub> as additive.

**Table S5** Crystallographic and structure refinement data for [PdCl(PPh<sub>3</sub>)<sub>2</sub>(4-Spy)] (**1a**) and [Pd(PPh<sub>3</sub>)<sub>2</sub>(4-Spy)<sub>2</sub>].2CH<sub>3</sub>OH (**2a**).

| Compounds                                      | [PdCl(PPh <sub>3</sub> ) <sub>2</sub> (4-Spy)]        | [Pd(PPh <sub>3</sub> ) <sub>2</sub> (4-Spy) <sub>2</sub> ].2CH <sub>3</sub> OH                |
|------------------------------------------------|-------------------------------------------------------|-----------------------------------------------------------------------------------------------|
| Chemical Formula                               | C <sub>41</sub> H <sub>34</sub> ClNP <sub>2</sub> PdS | C <sub>48</sub> H <sub>46</sub> N <sub>2</sub> O <sub>2</sub> P <sub>2</sub> PdS <sub>2</sub> |
| Formula weight                                 | 776.60                                                | 915.33                                                                                        |
| Crystal Size (mm <sup>3</sup> )                | 0.50 x 0.50 x 0.50                                    | 0.100 x 0.040 x 0.020                                                                         |
| T/K                                            | 298(2)                                                | 298(2)                                                                                        |
| λ/Å                                            | CuKα (λ = 1.54184 Å)                                  | CuKα (λ = 1.54184 Å)                                                                          |
| Crystal system                                 | Monoclinic                                            | Monoclinic                                                                                    |
| Space group                                    | C 2/c                                                 | P 21/c                                                                                        |
| a/Å                                            | 10.93610(10)                                          | 13.1283(2)                                                                                    |
| b/Å                                            | 16.70070(10)                                          | 19.3886(3)                                                                                    |
| c/Å                                            | 40.8473(4)                                            | 8.76560(10)                                                                                   |
| α/°                                            | 90                                                    | 90                                                                                            |
| β/°                                            | 96.7350(10)                                           | 91.4320(10)                                                                                   |
| γ/°                                            | 90                                                    | 90                                                                                            |
| V/Å <sup>3</sup>                               | 7408.89(11)                                           | 2230.49(5)                                                                                    |
| ρ <sub>calc</sub> /g cm <sup>-3</sup>          | 1.407                                                 | 1.363                                                                                         |
| Z                                              | 8                                                     | 2                                                                                             |
| μ/mm <sup>-1</sup>                             | 6.285                                                 | 5.219                                                                                         |
| Reflection collected/ unique                   | 17675/ 7339                                           | 16240/ 4504                                                                                   |
| Data/restraints/parameters                     | 7339/ 114/ 465                                        | 4504/ 0/ 261                                                                                  |
| Final R <sub>1</sub> , wR <sub>2</sub> indices | R1 = 0.0341, wR2 = 0.0928                             | R1 = 0.0353, wR2 = 0.0898                                                                     |
| R <sub>1</sub> , wR <sub>2</sub> (all data)    | R1 = 0.0631, wR2 = 0.1107                             | R1 = 0.0572, wR2 = 0.1109                                                                     |
| Largest diff. peak & hole [eÅ <sup>-3</sup> ]  | 1.164 and -1.929                                      | 0.912 and -1.148                                                                              |



**Table S6** Crystallographic and structure refinement data for [ $\{\text{Pd}(\text{PPh}_3)_2(4\text{-Spy})_2\}\{\text{Cu}(\text{PPh}_3)_2\text{Cl}\}_2$ ] (**3**) and [ $\{\text{Pd}(\text{PPh}_3)_2(4\text{-Sepy})_2\}\{\text{Cu}(\text{PPh}_3)_2\text{Cl}\}_2$ ] (**4**)

| Compounds                                               | <b>3</b>                                                                            | <b>4</b>                                                                             |
|---------------------------------------------------------|-------------------------------------------------------------------------------------|--------------------------------------------------------------------------------------|
| Chemical Formula                                        | $\text{C}_{118}\text{H}_{98}\text{Cl}_2\text{Cu}_2\text{N}_2\text{P}_6\text{PdS}_2$ | $\text{C}_{118}\text{H}_{98}\text{Cl}_2\text{Cu}_2\text{N}_2\text{P}_6\text{PdSe}_2$ |
| Formula weight                                          | 2098.30                                                                             | 2192.10                                                                              |
| Crystal Size ( $\text{mm}^3$ )                          | 0.25 x 0.15 x 0.05                                                                  | 0.25 x 0.20 x 0.05                                                                   |
| T/K                                                     | 298(2)                                                                              | 298(2)                                                                               |
| $\lambda/\text{\AA}$                                    | $\text{CuK}\alpha$ ( $\lambda = 1.54184 \text{ \AA}$ )                              | $\text{CuK}\alpha$ ( $\lambda = 1.54184 \text{ \AA}$ )                               |
| Crystal system                                          | Triclinic                                                                           | Triclinic                                                                            |
| Space group                                             | P -1                                                                                | P -1                                                                                 |
| $a/\text{\AA}$                                          | 11.68270(10)                                                                        | 12.3318(4)                                                                           |
| $b/\text{\AA}$                                          | 14.22020(10)                                                                        | 12.7988(5)                                                                           |
| $c/\text{\AA}$                                          | 16.74980(10)                                                                        | 19.1873(7)                                                                           |
| $\alpha/^\circ$                                         | 69.4180(10)                                                                         | 81.853(3)                                                                            |
| $\beta/^\circ$                                          | 78.0530(10)                                                                         | 77.968(3)                                                                            |
| $\gamma/^\circ$                                         | 83.5570(10)                                                                         | 67.800(4)                                                                            |
| $V/\text{\AA}^3$                                        | 2546.24(4)                                                                          | 2735.65(19)                                                                          |
| $\rho_{\text{calc}}/\text{g cm}^{-3}$                   | 1.368                                                                               | 1.331                                                                                |
| Z                                                       | 1                                                                                   | 1                                                                                    |
| $\mu/\text{mm}^{-1}$                                    | 4.040                                                                               | 4.164                                                                                |
| Reflection collected/ unique                            | 24515/ 10386                                                                        | 24515/ 11074                                                                         |
| Data/restraints/parameters                              | 10386/ 0/ 602                                                                       | 11074/ 81/ 629                                                                       |
| Final $R_1$ , $wR_2$ indices                            | $R_1 = 0.0420$ , $wR_2 = 0.1063$                                                    | $R_1 = 0.0467$ , $wR_2 = 0.1363$                                                     |
| $R_1$ , $wR_2$ (all data)                               | $R_1 = 0.0436$ , $wR_2 = 0.1075$                                                    | $R_1 = 0.0531$ , $wR_2 = 0.1424$                                                     |
| Largest diff. peak & hole [ $\text{e}\text{\AA}^{-3}$ ] | 1.673 and -0.962                                                                    | 0.944 and -0.792                                                                     |

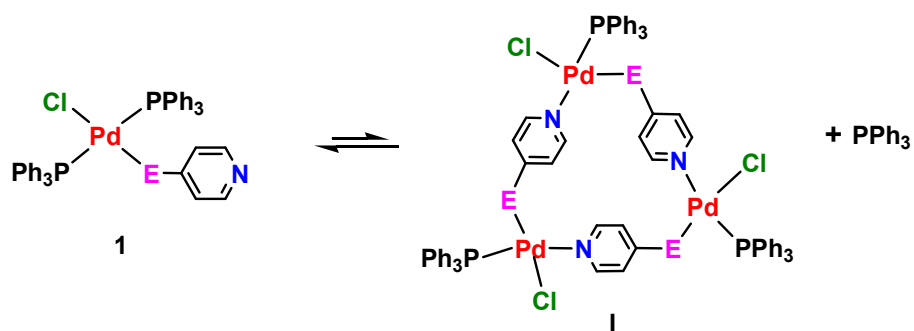

**Scheme S1** Equilibria between monomeric complex **1** [PdCl(PPh<sub>3</sub>)<sub>2</sub>(4-Epy)] and trimeric complex [PdCl(PPh<sub>3</sub>)(4-Septy)]<sub>3</sub> (**I**).

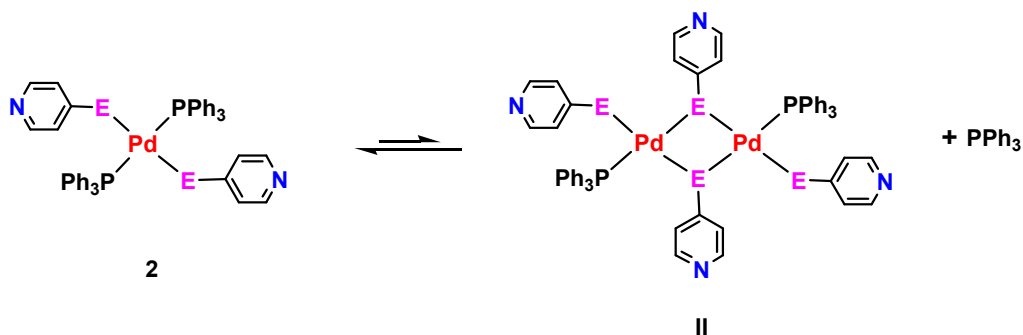

**Scheme S2** Equilibria between monomeric complex **2** [Pd(PPh<sub>3</sub>)<sub>2</sub>(4-Epy)<sub>2</sub>] and dimeric complex [Pd(PPh<sub>3</sub>)(μ-4-Epy)(4-Epy)]<sub>2</sub> (**II**).

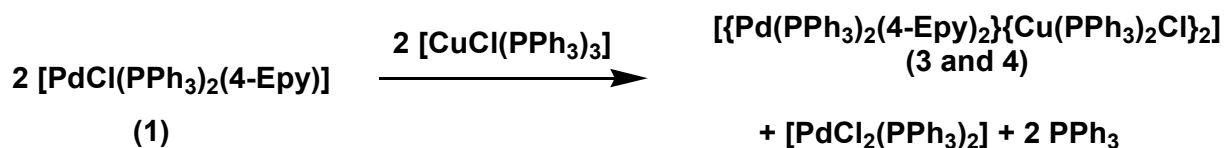

**Scheme S3.** Preparation of **3** and **4** [{Pd(PPh<sub>3</sub>)<sub>2</sub>(4-Septy)<sub>2</sub>} {Cu(PPh<sub>3</sub>)<sub>2</sub>Cl}<sub>2</sub>] via route i.

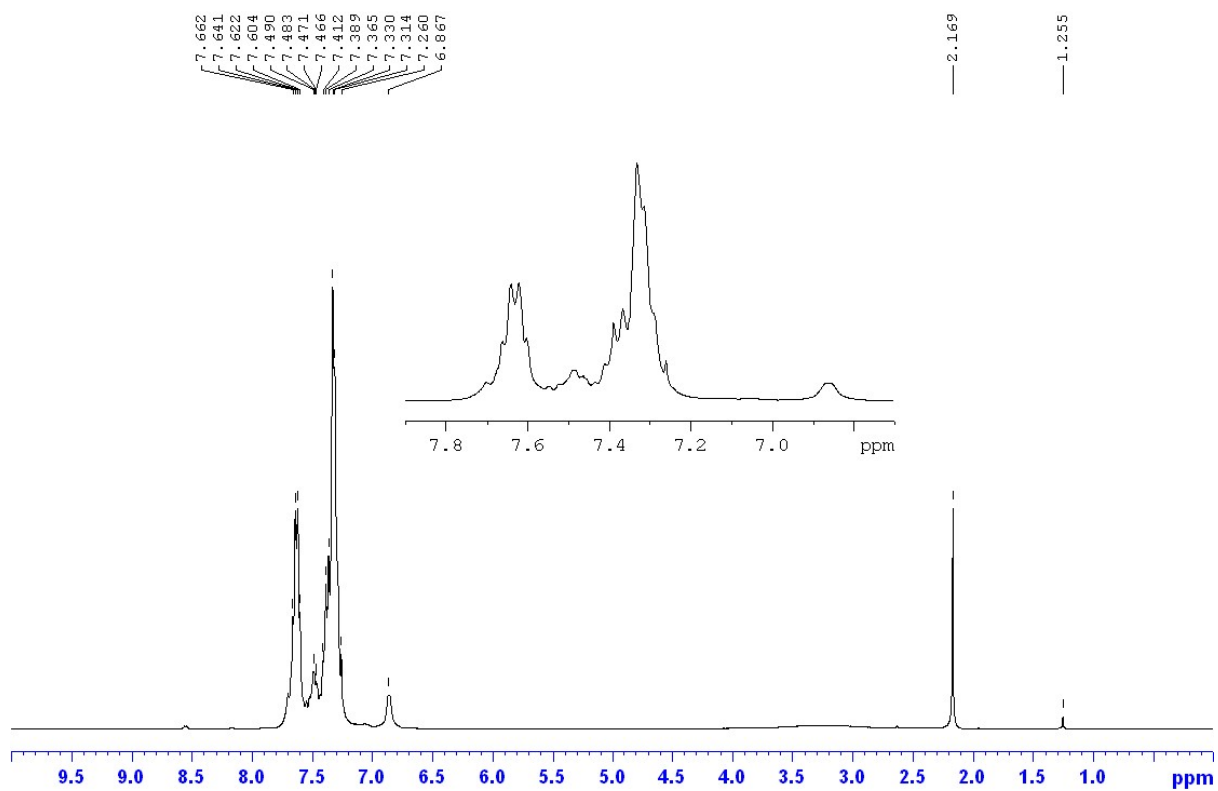

**Fig. S1**  $^1\text{H}$  NMR (300 MHz,  $\text{CDCl}_3$ ) of  $[\text{PdCl}(\text{PPh}_3)_2(4\text{-Spy})]$  (**1a**).

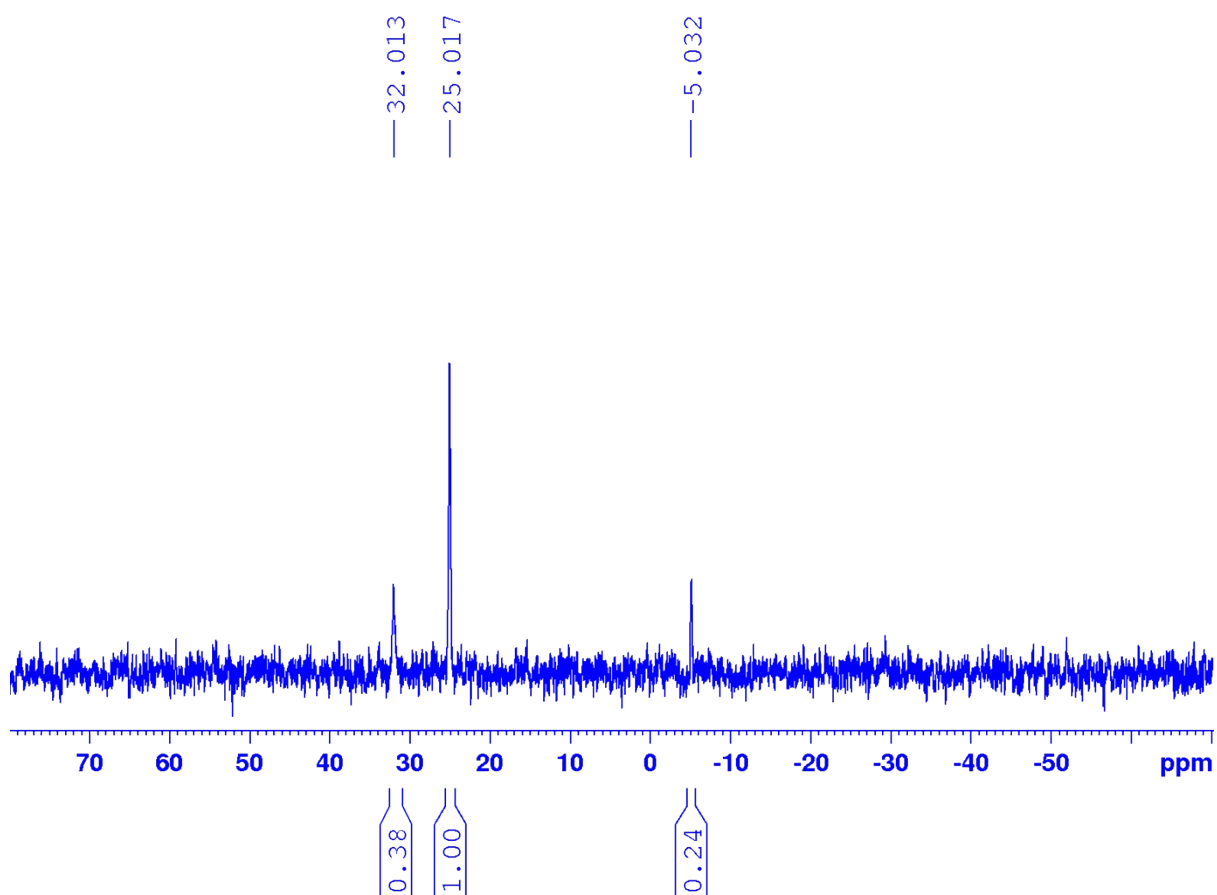

**Fig. S2**  $^{31}\text{P}\{^1\text{H}\}$  NMR (121.5 MHz,  $\text{CDCl}_3$ ) of  $[\text{PdCl}(\text{PPh}_3)_2(4\text{-Spy})]$  (**1a**).

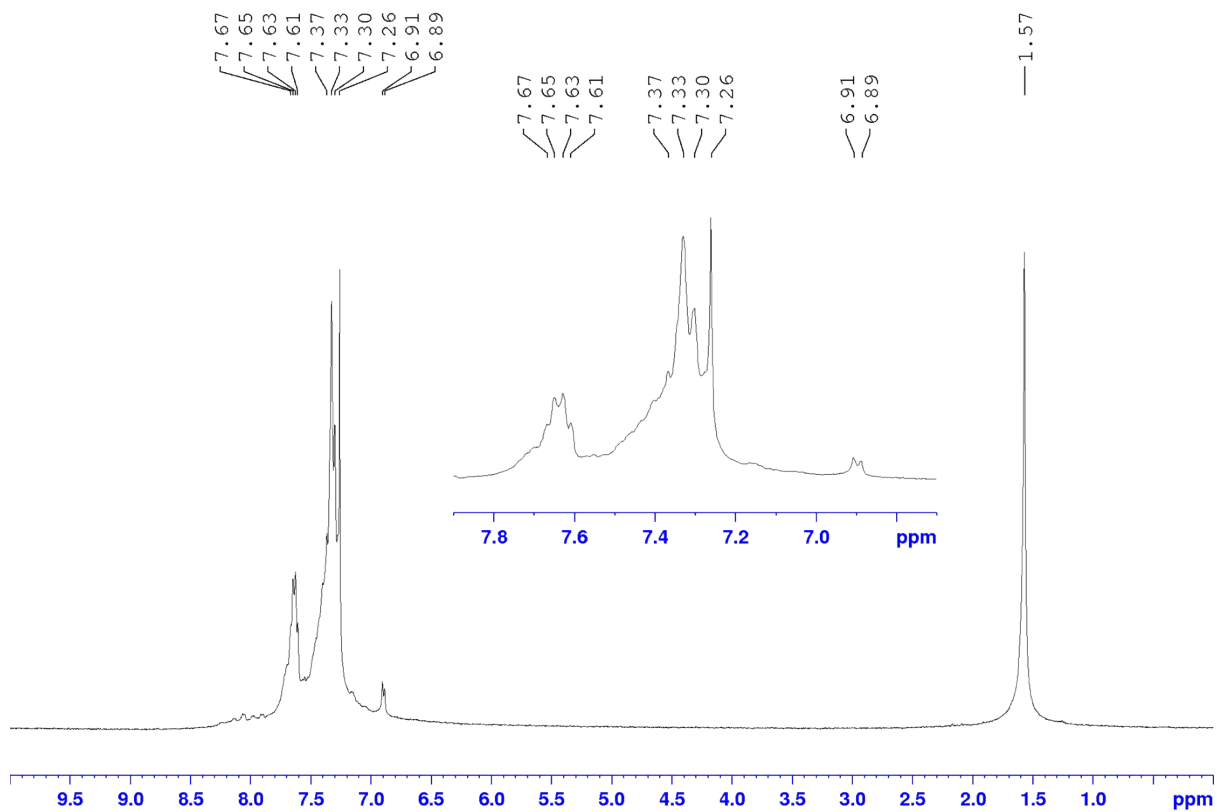

**Fig. S3**  $^1\text{H}$  NMR (300 MHz,  $\text{CDCl}_3$ ) of  $[\text{PdCl}(\text{PPh}_3)_2(4\text{-Sepy})]$  (**1b**).

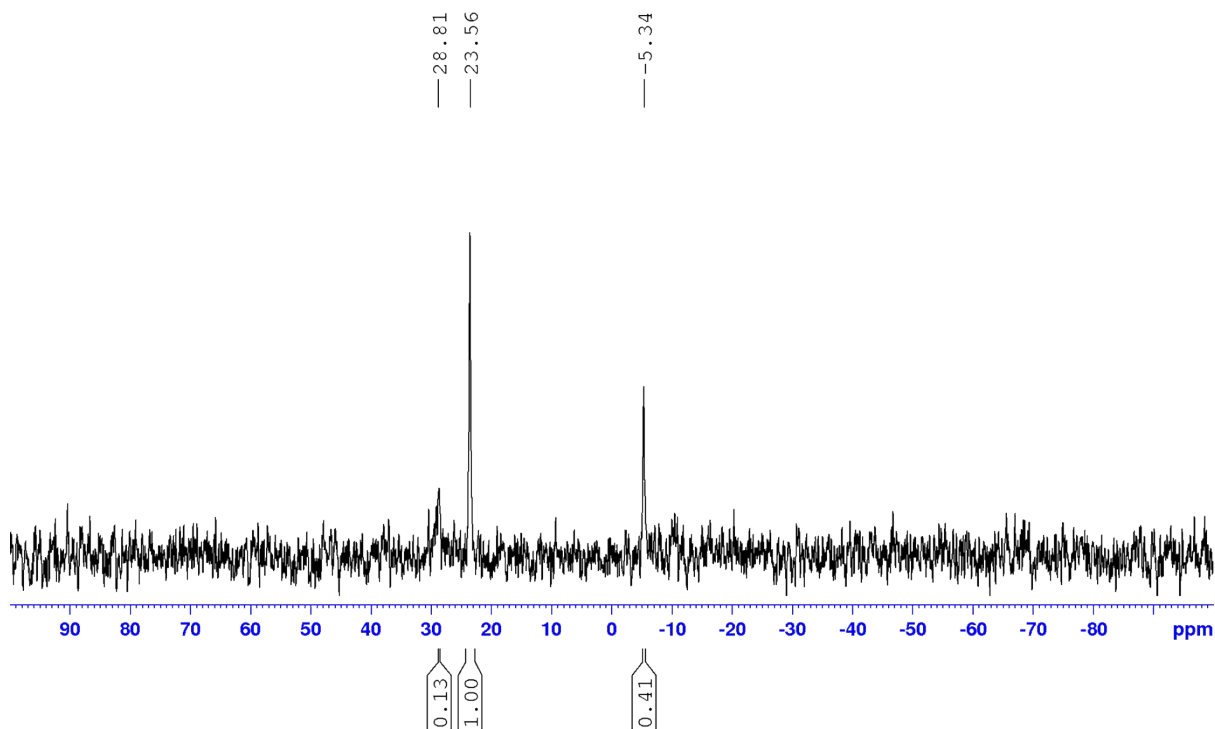

**Fig. S4**  $^{31}\text{P}\{^1\text{H}\}$  NMR (121.5 MHz,  $\text{CDCl}_3$ ) of  $[\text{PdCl}(\text{PPh}_3)_2(4\text{-Sepy})]$  (**1b**).

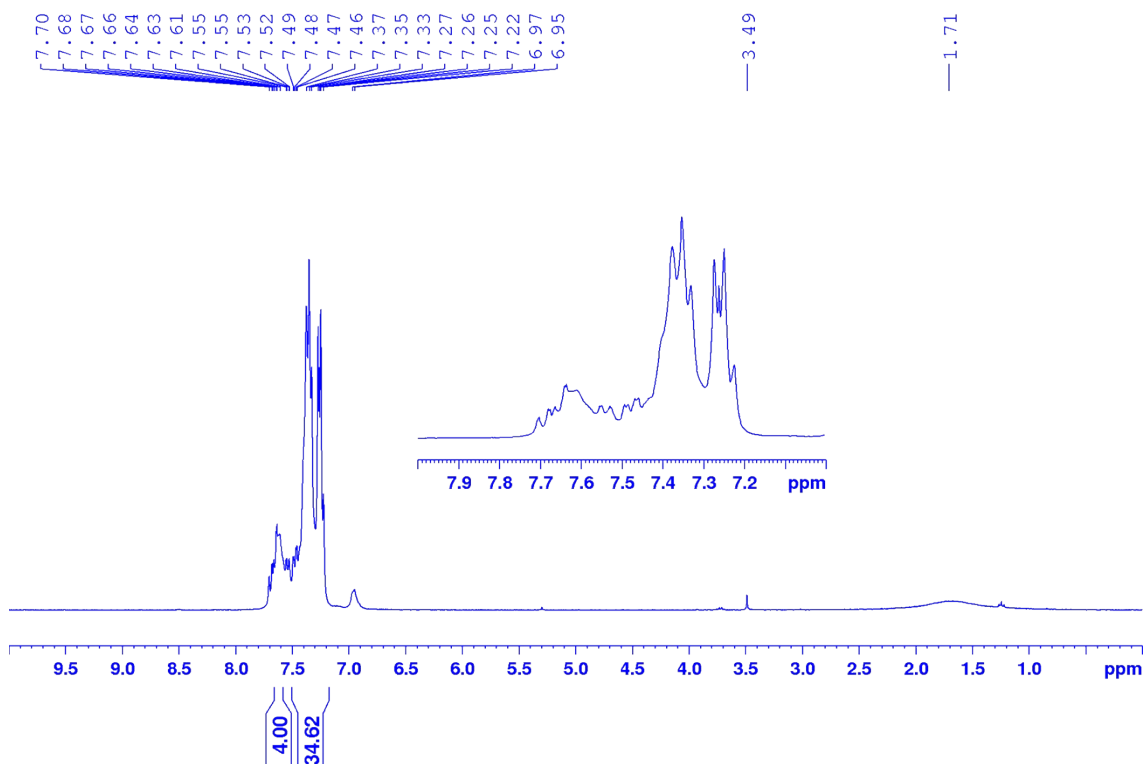

**Fig. S5**  $^1\text{H}$  NMR (300 MHz,  $\text{CDCl}_3$ ) of  $[\{\text{Pd}(\text{PPh}_3)_2(4\text{-Spy})_2\}\{\text{Cu}(\text{PPh}_3)_2\text{Cl}\}_2]$  (**3**) prepared from route (i).

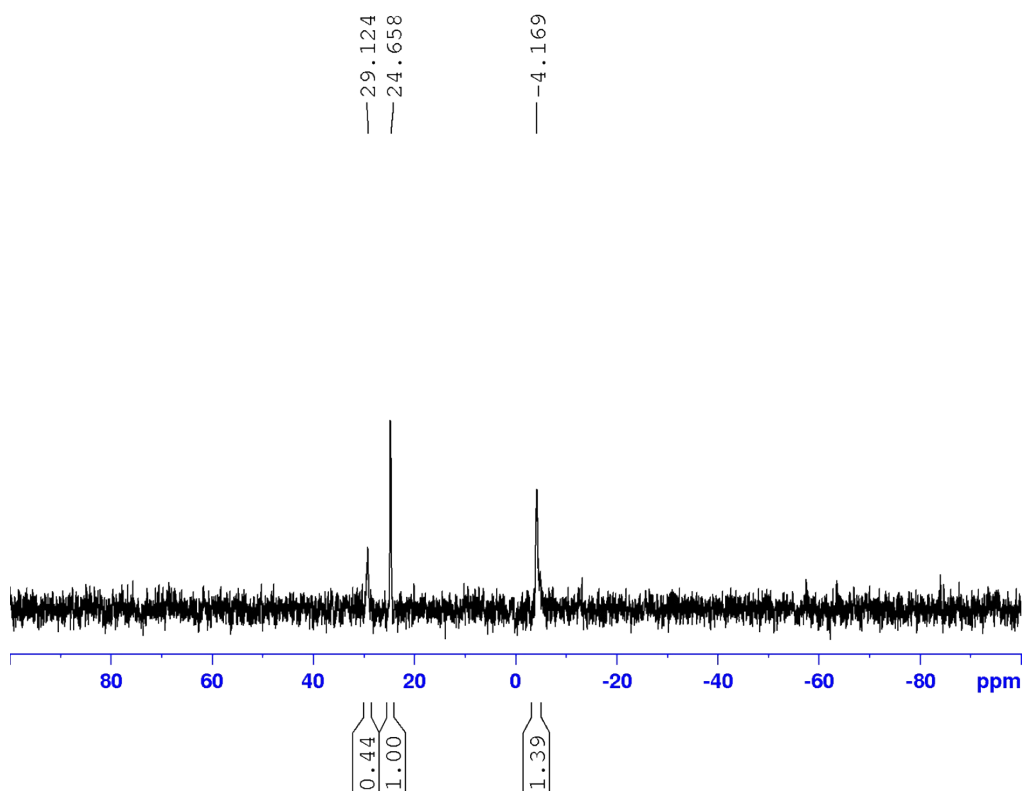

**Fig. S6**  $^{31}\text{P}\{^1\text{H}\}$  NMR (121.5 MHz,  $\text{CDCl}_3$ ) of  $[\{\text{Pd}(\text{PPh}_3)_2(4\text{-Spy})_2\}\{\text{Cu}(\text{PPh}_3)_2\text{Cl}\}_2]$  (**3**) prepared from route (i).

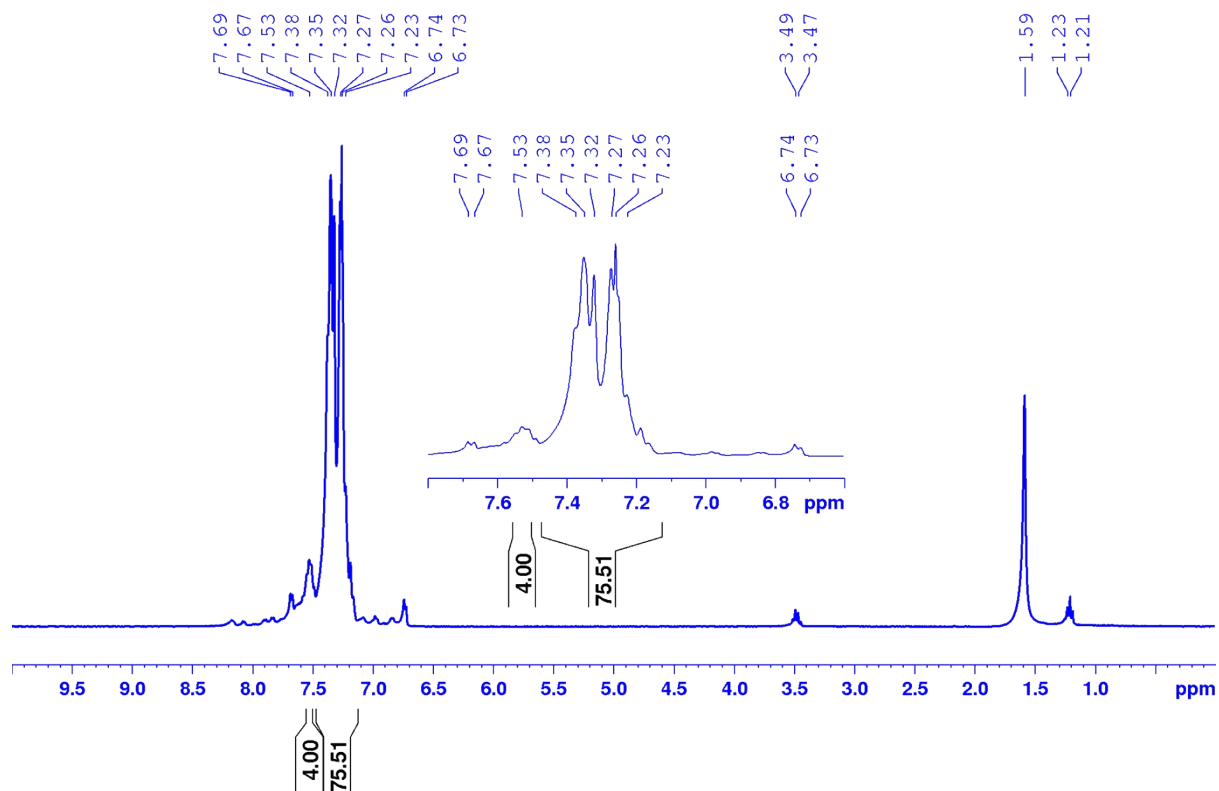

**Fig. S7**  $^1\text{H}$  NMR (300 MHz,  $\text{CDCl}_3$ ) of  $[\{\text{Pd}(\text{PPh}_3)_2(4\text{-Spy})_2\}\{\text{Cu}(\text{PPh}_3)_2\text{Cl}\}_2]$  (**3**) prepared from route (ii).

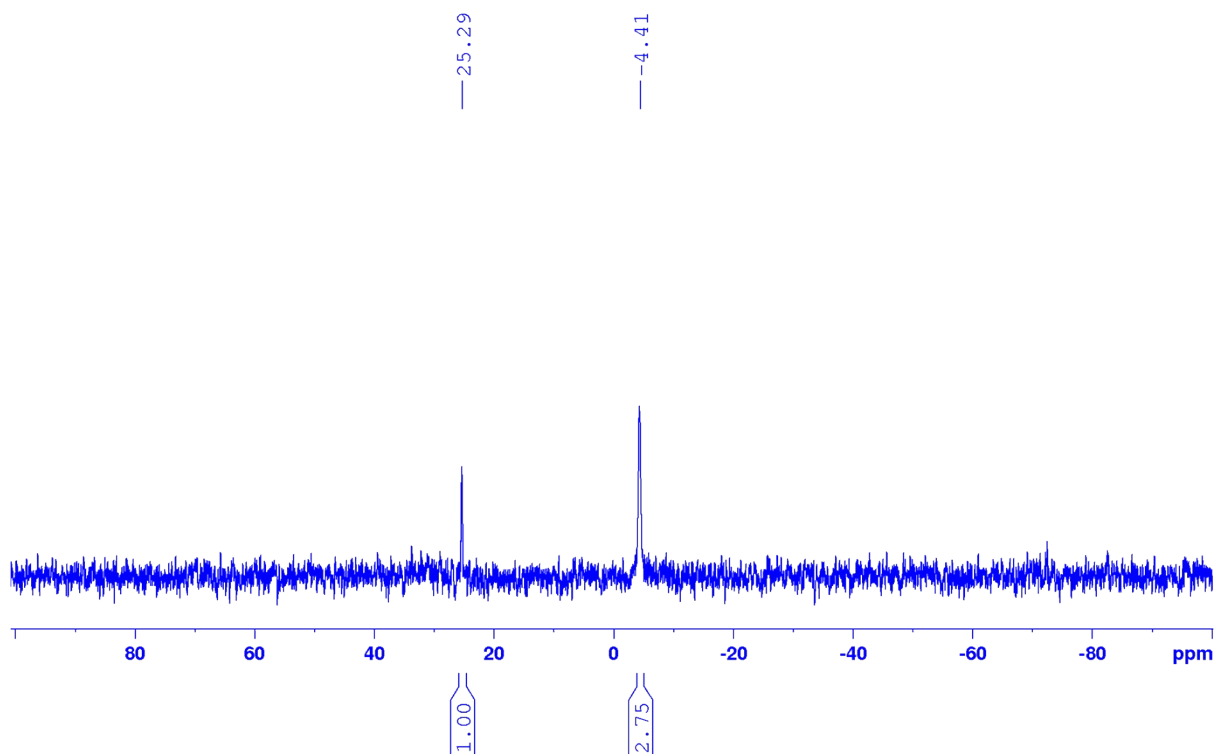

**Fig. S8**  $^{31}\text{P}\{^1\text{H}\}$  NMR (121.5 MHz,  $\text{CDCl}_3$ ) of  $[\{\text{Pd}(\text{PPh}_3)_2(4\text{-Spy})_2\}\{\text{Cu}(\text{PPh}_3)_2\text{Cl}\}_2]$  (**3**) prepared from route (ii).

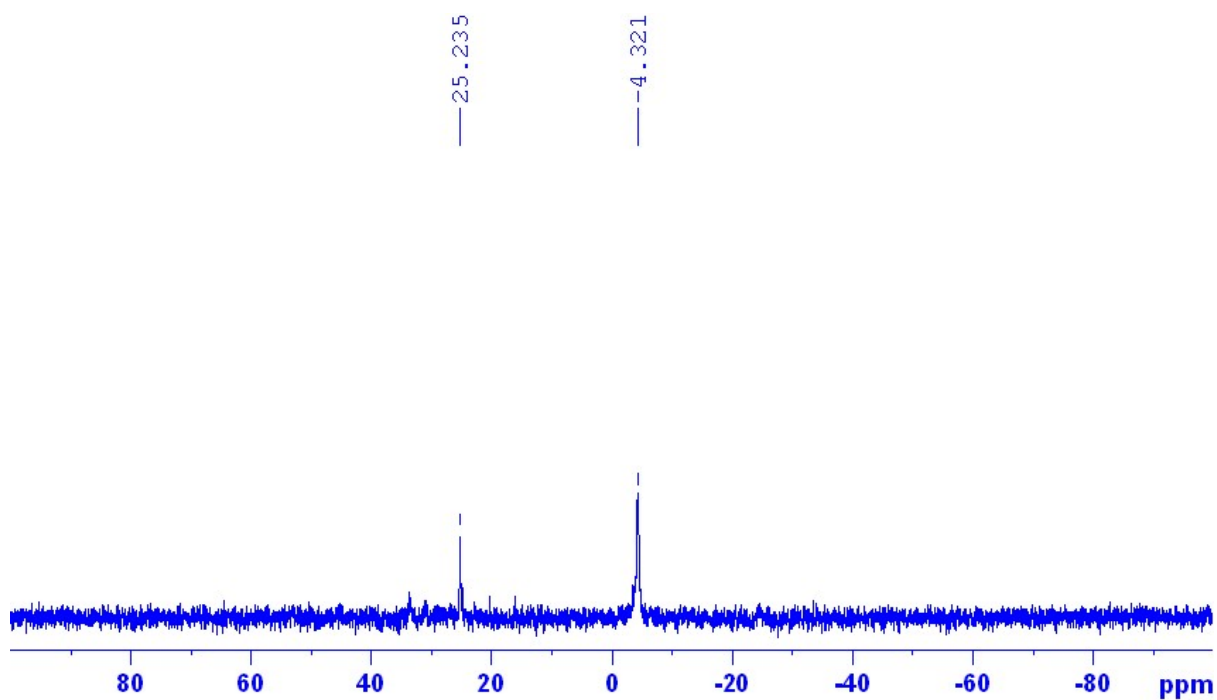

**Fig. S9**  $^{31}\text{P}\{^1\text{H}\}$  NMR (121.5 MHz,  $\text{CDCl}_3$ ) of  $[\{\text{Pd}(\text{PPh}_3)_2(4\text{-Spy})_2\}\{\text{Cu}(\text{PPh}_3)_2\text{Cl}\}_2]$  (**3**) prepared from route (ii) after 1 day.

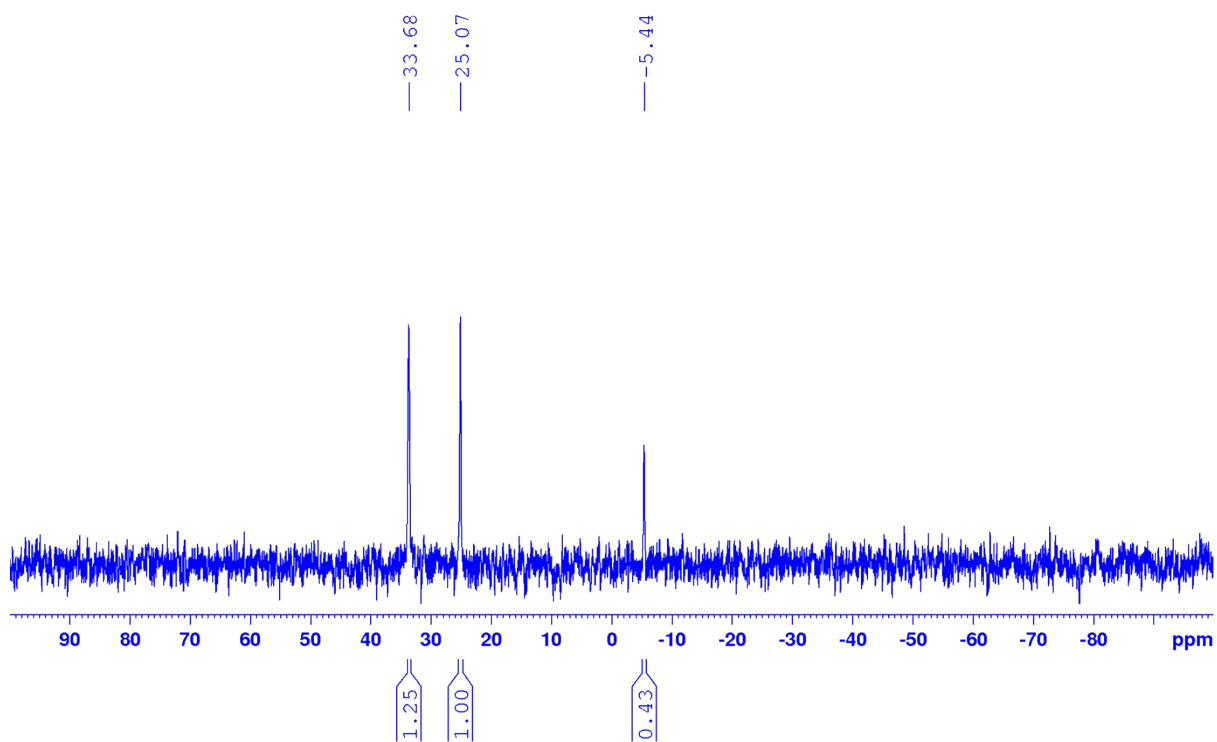

**Fig. S10**  $^{31}\text{P}\{^1\text{H}\}$  NMR (121.5 MHz,  $\text{CDCl}_3$ ) of  $[\text{Pd}(\text{PPh}_3)_2(4\text{-Spy})_2]$  (**2a**).



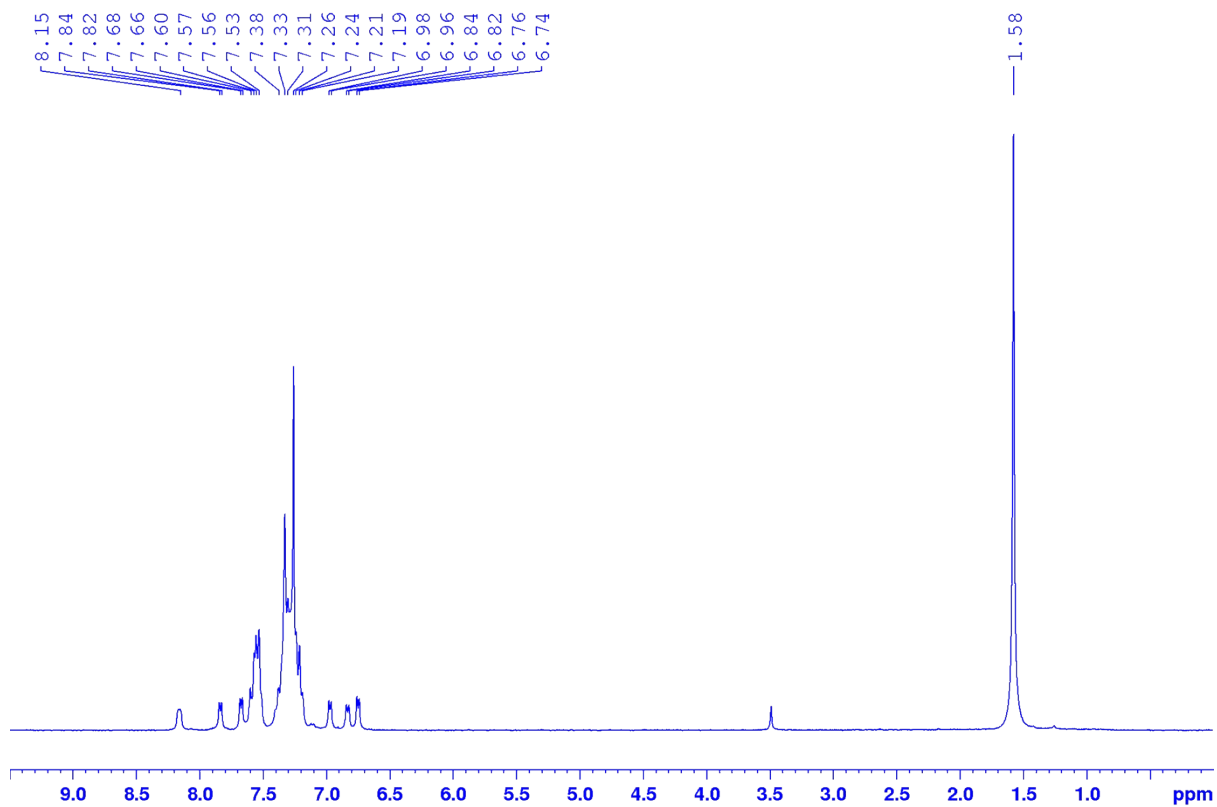

**Fig. S11**  $^1\text{H}$  NMR (300 MHz,  $\text{CDCl}_3$ ) of  $[\text{Pd}(\text{PPh}_3)_2(4\text{-Spy})_2]$  (**2a**).

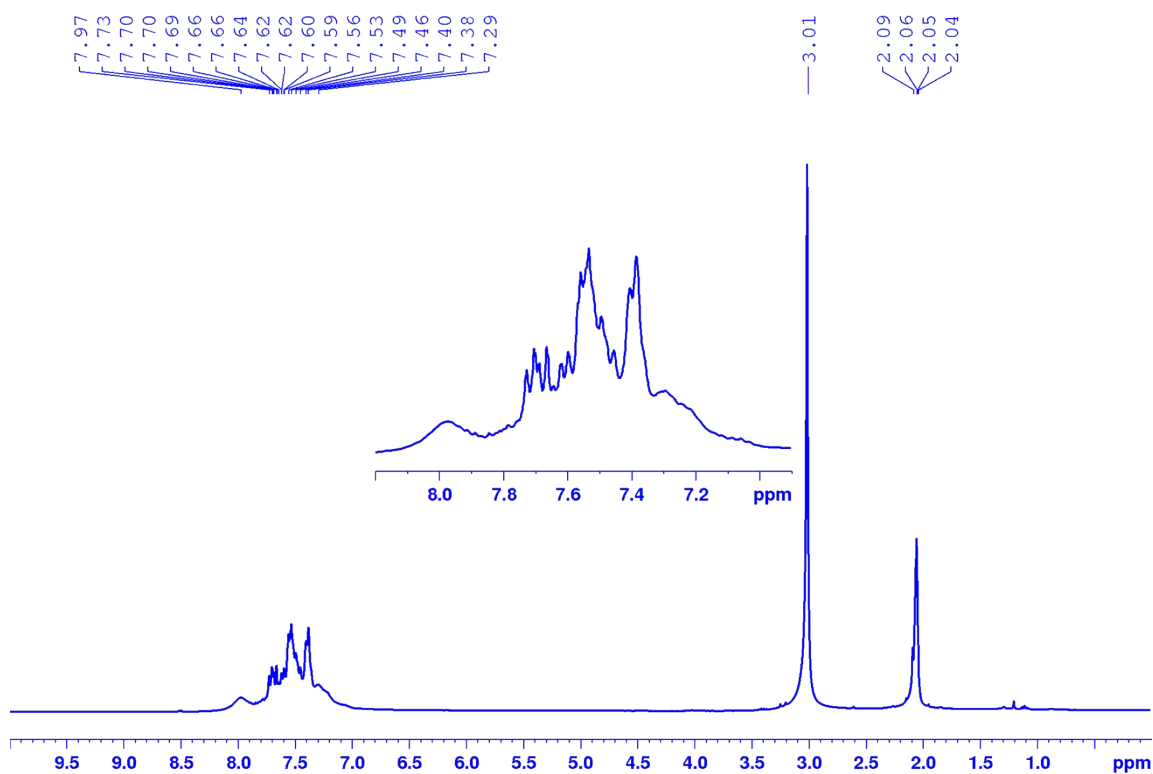

**Fig. S12**  $^1\text{H}$  NMR (300 MHz,  $\text{Acetone-d}_6$ ) of  $[\text{Pd}(\text{PPh}_3)_2(4\text{-Sepy})_2]$  (**2b**).

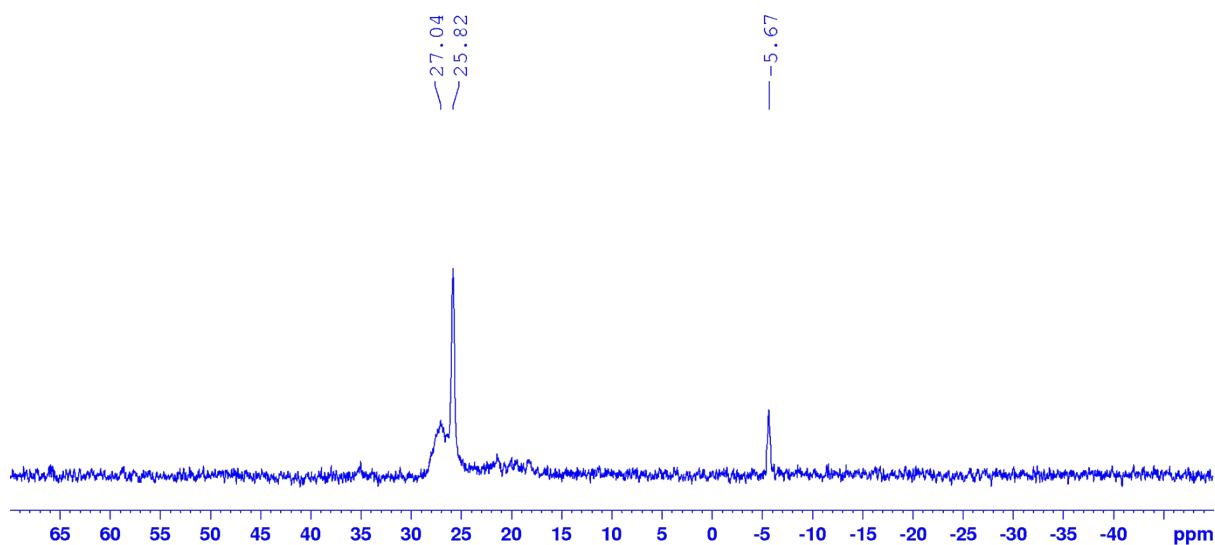

**Fig. S13**  $^{31}\text{P}\{^1\text{H}\}$  NMR (121.5 MHz, Acetone- $d_6$ ) of  $[\text{Pd}(\text{PPh}_3)_2(4\text{-Sepy})_2]$  (**2b**).

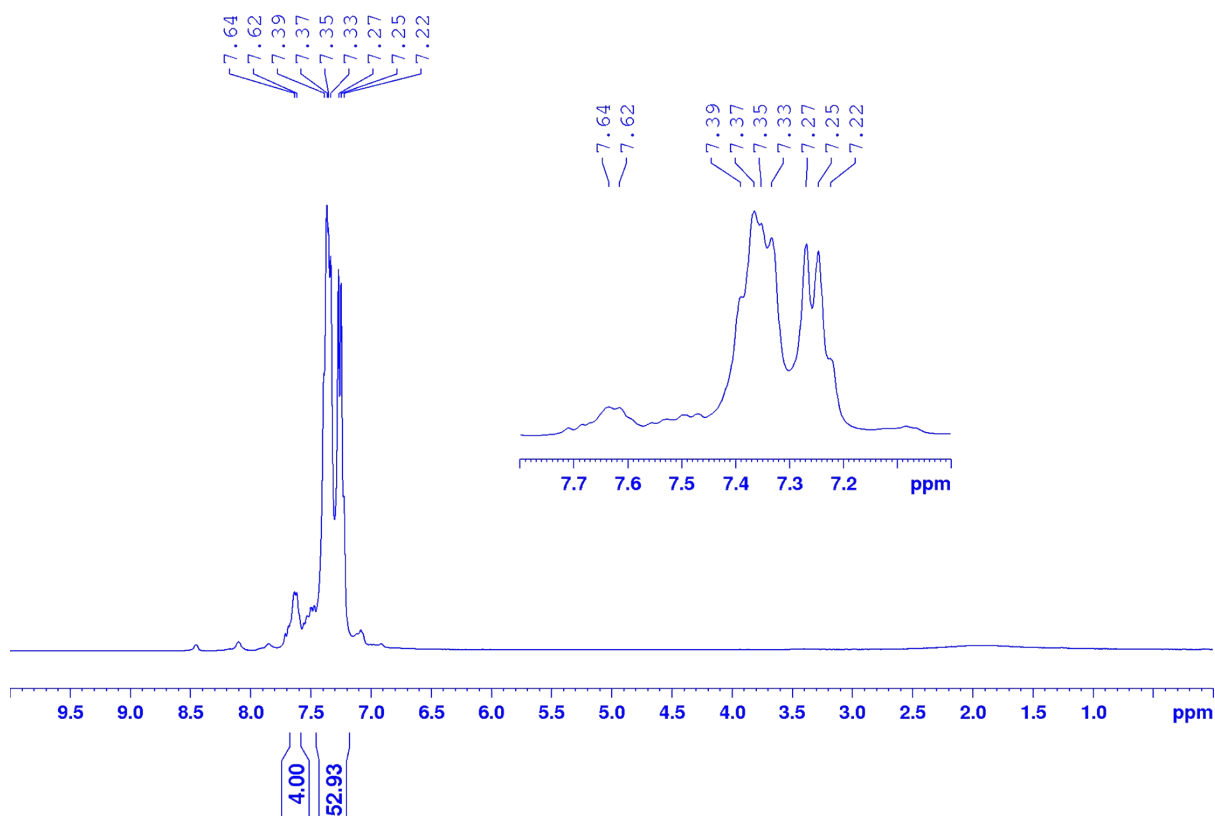

**Fig. S14**  $^1\text{H}$  NMR (300 MHz,  $\text{CDCl}_3$ ) of  $[\{\text{Pd}(\text{PPh}_3)_2(4\text{-Sepy})_2\}\{\text{Cu}(\text{PPh}_3)_2\text{Cl}\}_2]$  (**4**) prepared from route (i).

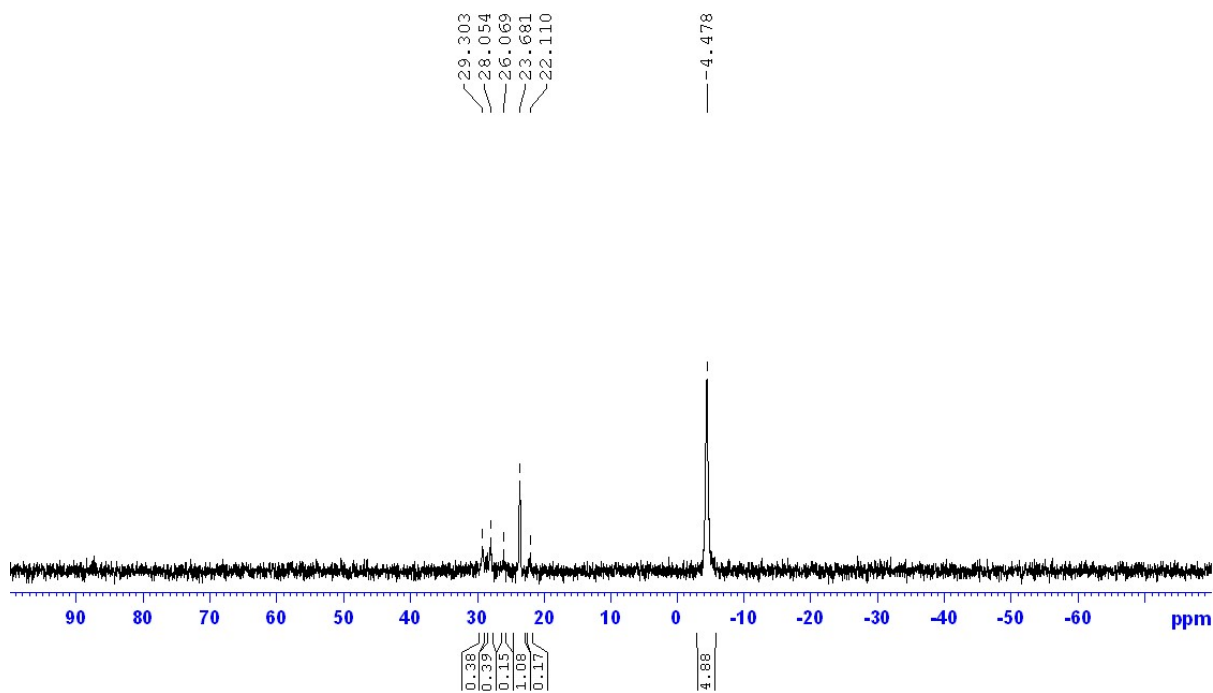

**Fig. S15**  $^{31}\text{P}\{^1\text{H}\}$  NMR (121.5 MHz,  $\text{CDCl}_3$ ) of  $[\{\text{Pd}(\text{PPh}_3)_2(4\text{-Sepy})_2\}\{\text{Cu}(\text{PPh}_3)_2\text{Cl}\}_2]$  (**4**) prepared from route (i).

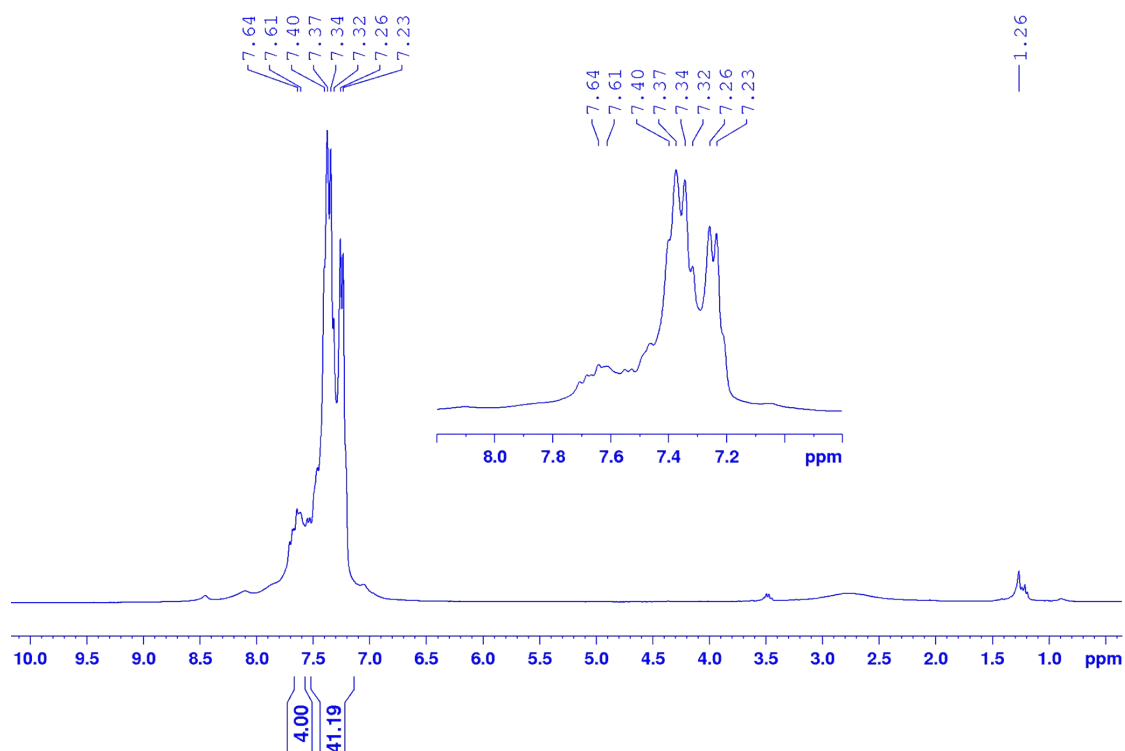

**Fig. S16**  $^1\text{H}$  NMR (300 MHz,  $\text{CDCl}_3$ ) of  $[\{\text{Pd}(\text{PPh}_3)_2(4\text{-Sepy})_2\}\{\text{Cu}(\text{PPh}_3)_2\text{Cl}\}_2]$  (**4**) prepared from route (ii).

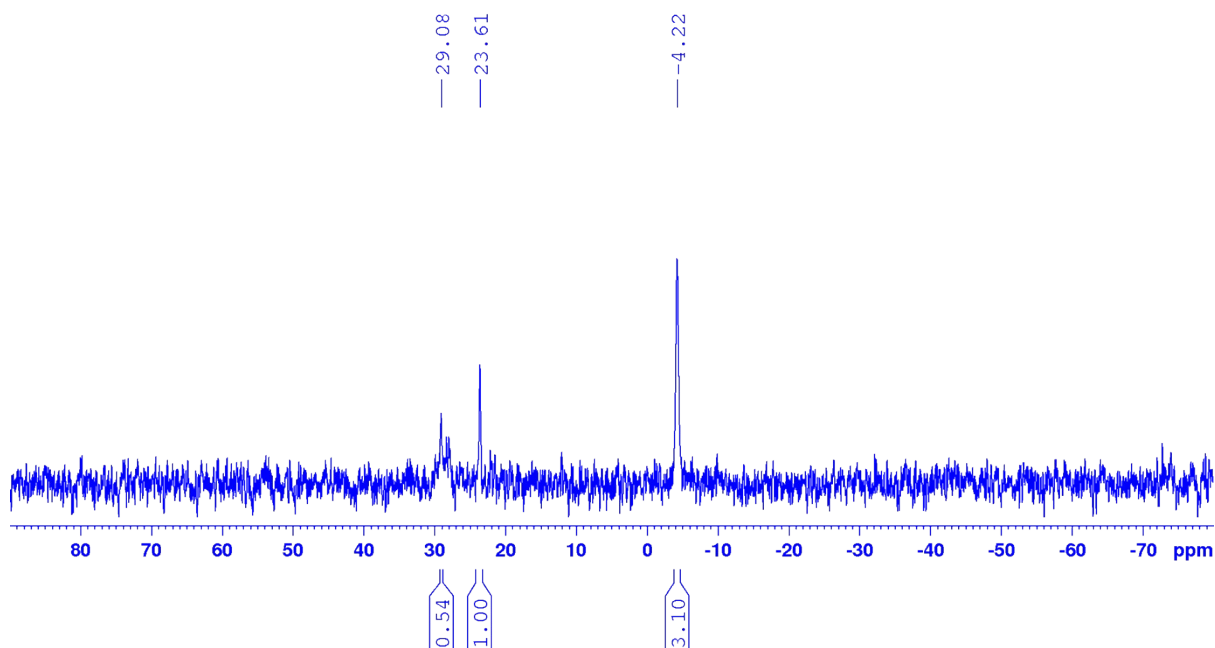

**Fig. S17**  $^{31}\text{P}\{^1\text{H}\}$  NMR (121.5 MHz,  $\text{CDCl}_3$ ) of  $[\{\text{Pd}(\text{PPh}_3)_2(4\text{-Sepy})_2\}\{\text{Cu}(\text{PPh}_3)_2\text{Cl}\}_2]$  (**4**) prepared from route (ii).

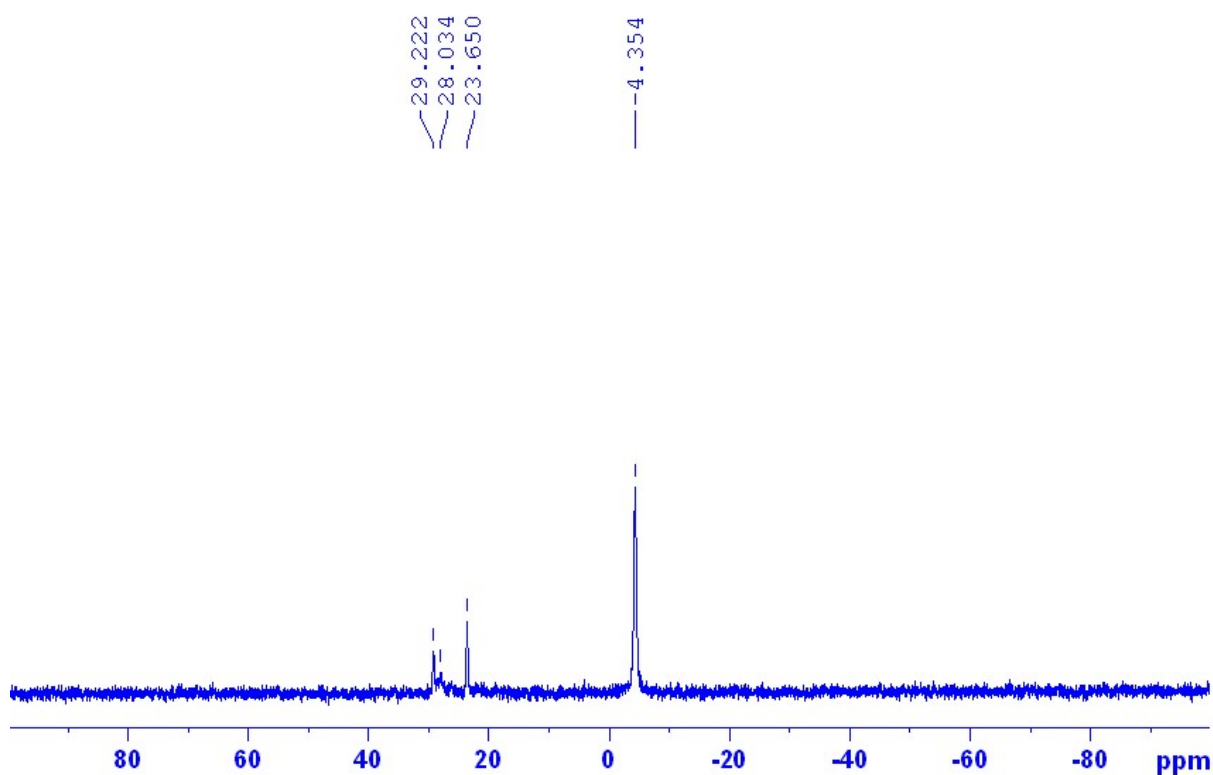

**Fig. S18**  $^{31}\text{P}\{^1\text{H}\}$  NMR (121.5 MHz,  $\text{CDCl}_3$ ) of  $[\{\text{Pd}(\text{PPh}_3)_2(4\text{-Sepy})_2\}\{\text{Cu}(\text{PPh}_3)_2\text{Cl}\}_2]$  (**4**) prepared from route (ii) after 1 day.

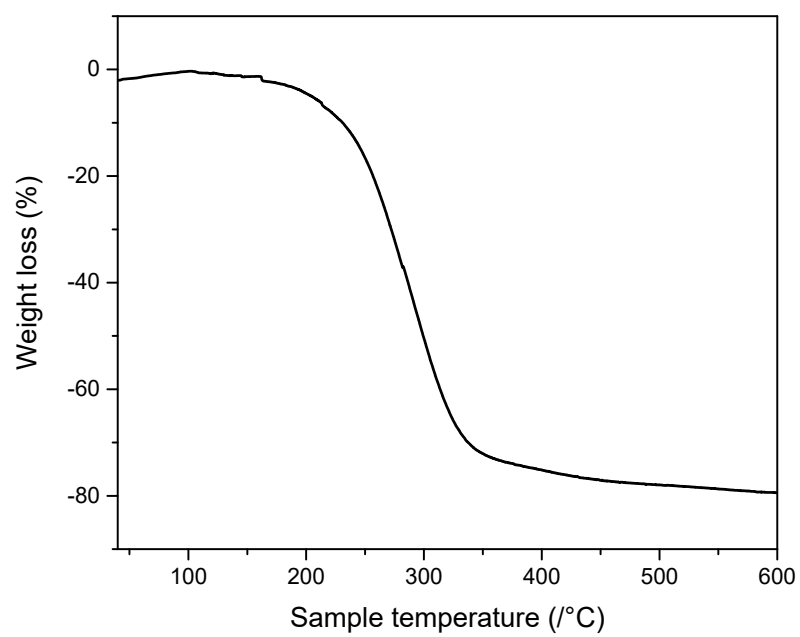

**Fig. S19** Thermogravimetric curve of [ $\{\text{Pd}(\text{PPh}_3)_2(4\text{-Sepy})_2\} \{\text{Cu}(\text{PPh}_3)_2\text{Cl}\}_2$ ] (**4**).

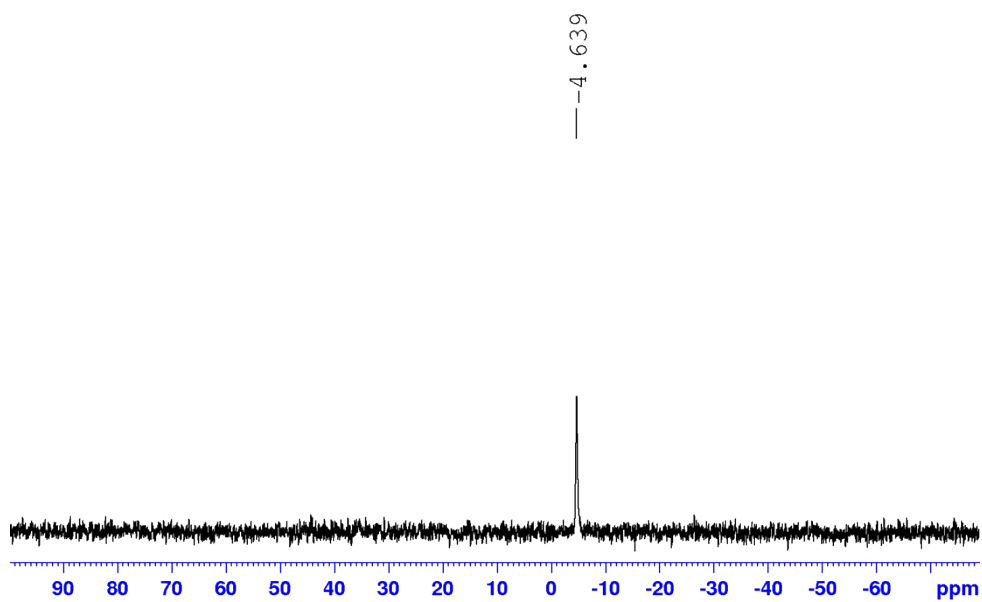

**Fig. S20**  $^{31}\text{P}\{^1\text{H}\}$  NMR (300 MHz,  $\text{CDCl}_3$ ) of  $[\text{Cu}(\text{PPh}_3)_3\text{Cl}]$ .

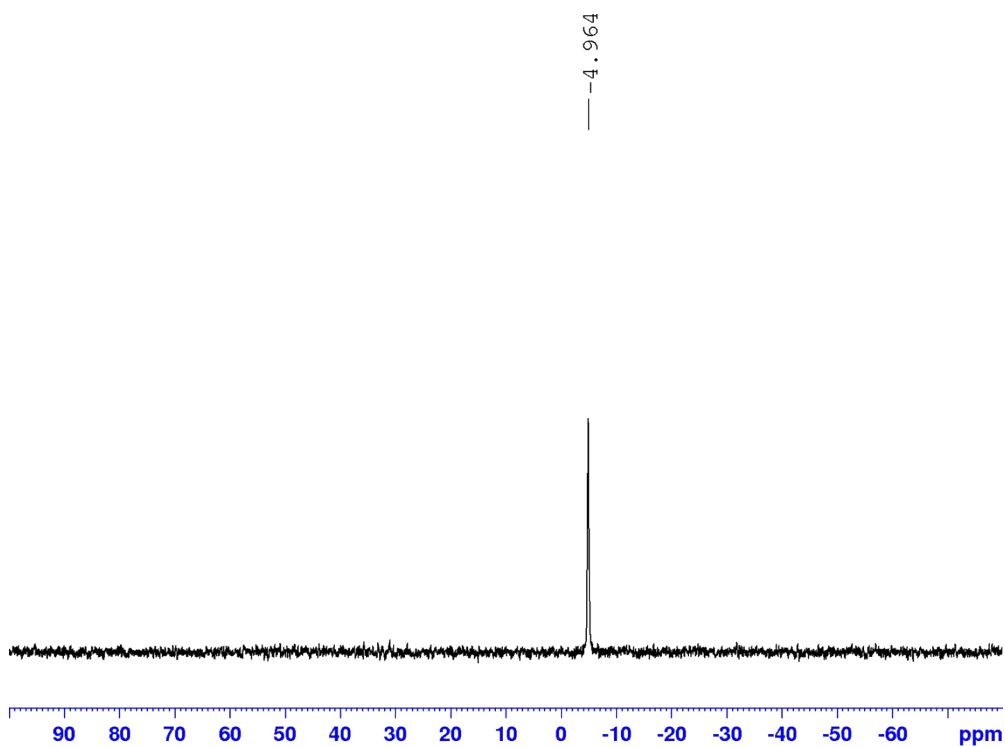

**Fig. S21**  $^{31}\text{P}\{^1\text{H}\}$  NMR (300 MHz,  $\text{CDCl}_3$ ) of  $[\text{Cu}(\text{PPh}_3)_3\text{Cl}] + \text{PPh}_3$  in (1:1 stoichiometry) immediately.

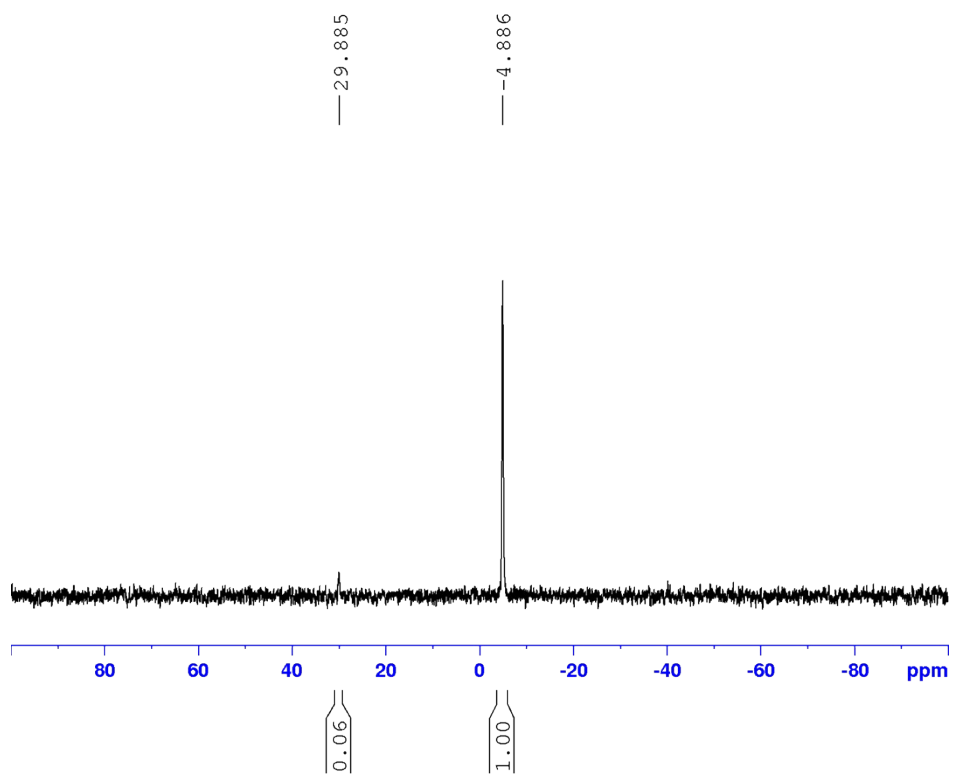

**Fig. S22**  $^{31}\text{P}\{^1\text{H}\}$  NMR (300 MHz,  $\text{CDCl}_3$ ) of  $[\text{Cu}(\text{PPh}_3)_3\text{Cl}] + \text{PPh}_3$  in (1:1 stoichiometry) after 1 day.

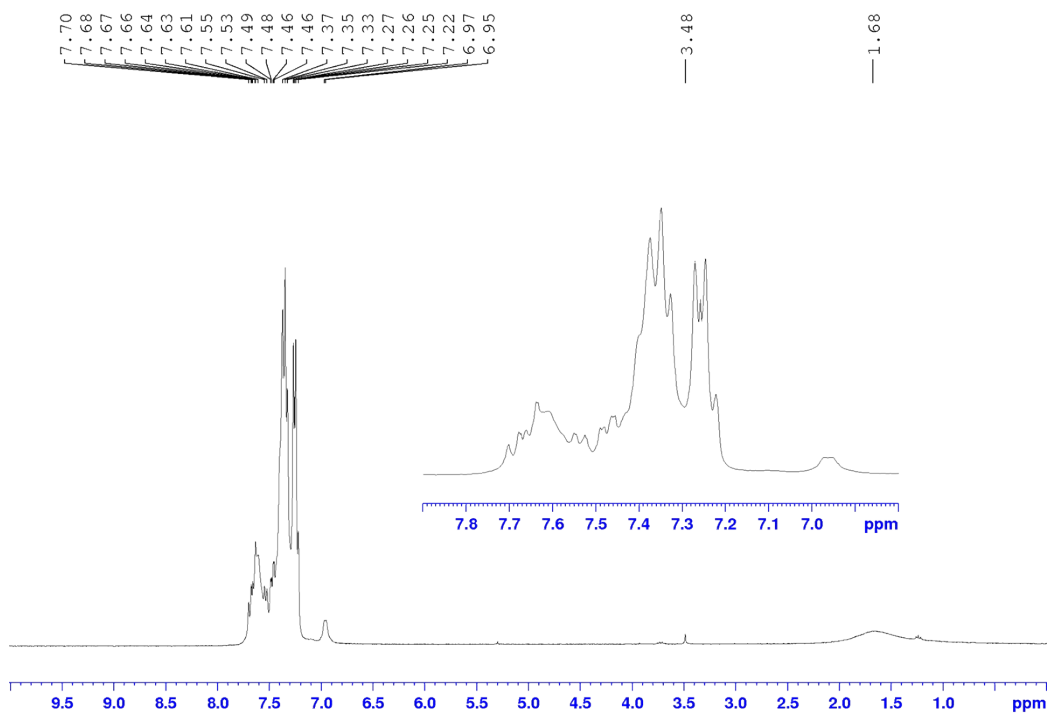

**Fig. S23**  $^1\text{H}$  NMR (300 MHz,  $\text{CDCl}_3$ ) of  $[\{\text{Pd}(\text{PPh}_3)_2(4\text{-Spy})_2\}\{\text{Cu}(\text{PPh}_3)_2\text{Cl}\}_2]$  (**3**) prepared from route (i) after overnight.

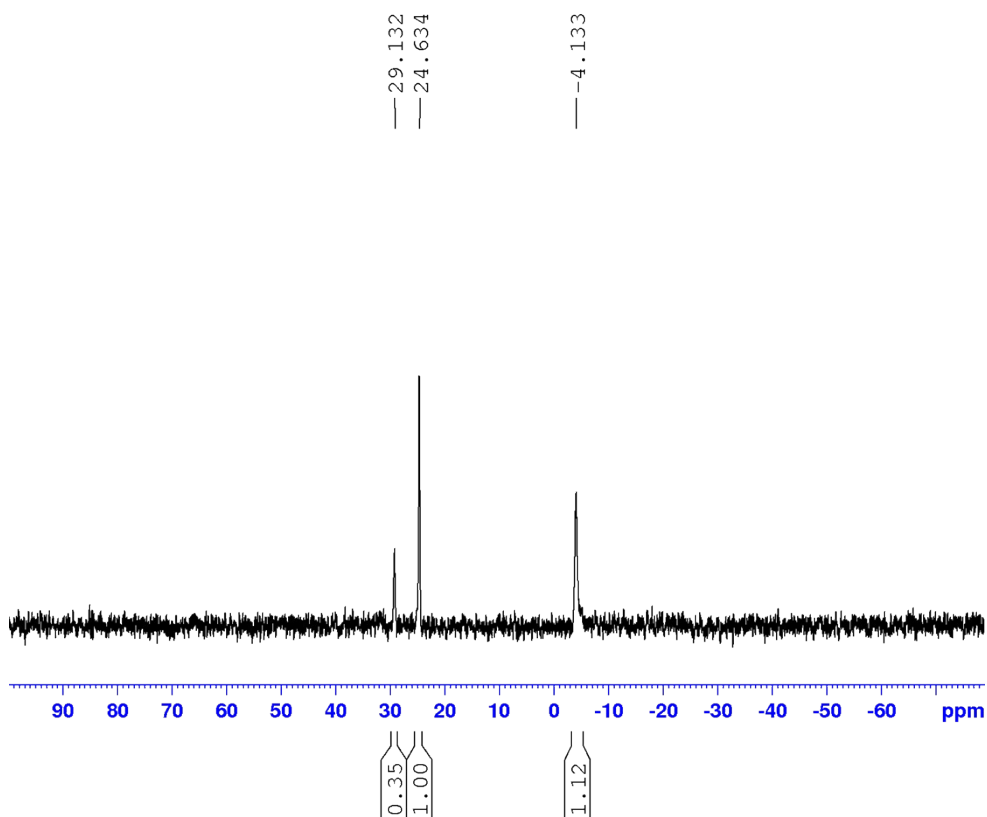

**Fig. S24**  $^{31}\text{P}\{^1\text{H}\}$  NMR (121.5 MHz,  $\text{CDCl}_3$ ) of  $[\{\text{Pd}(\text{PPh}_3)_2(4\text{-Spy})_2\}\{\text{Cu}(\text{PPh}_3)_2\text{Cl}\}_2]$  (**3**) prepared from route (i) after overnight.



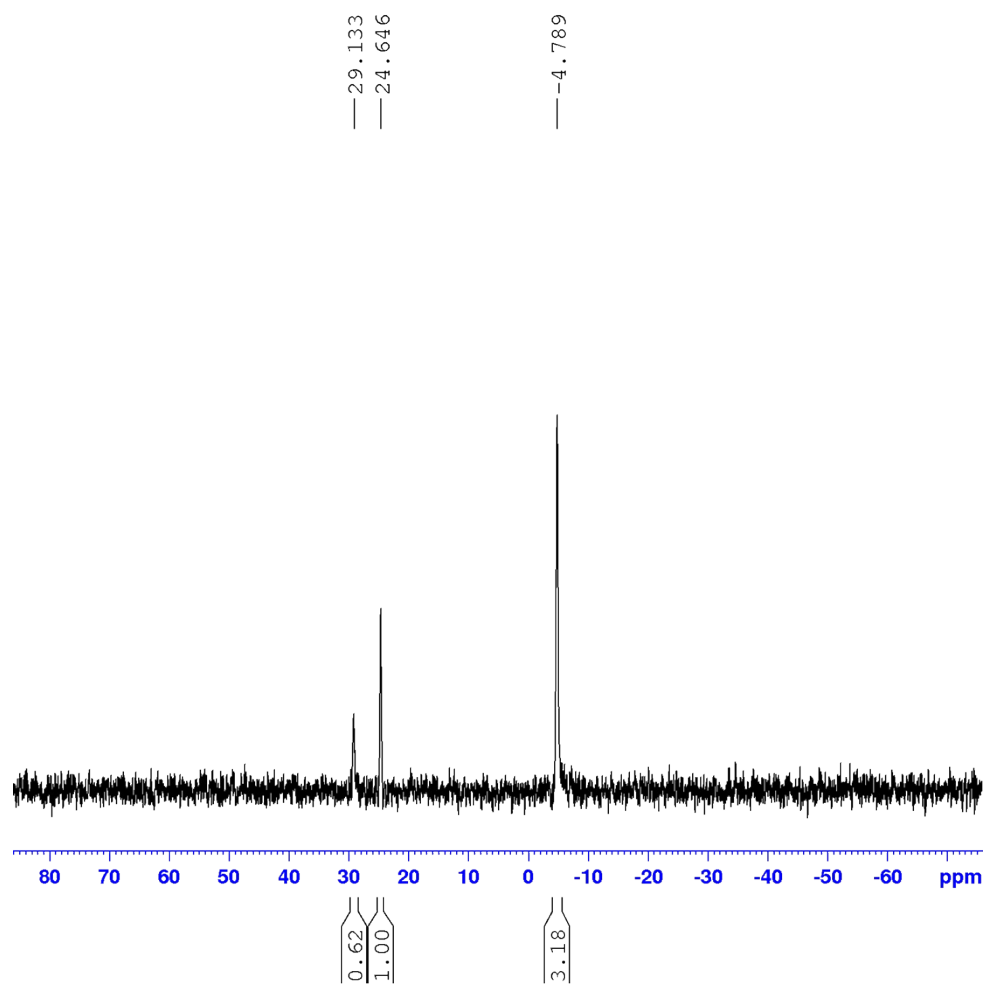

**Fig. S25**  $^{31}\text{P}\{^1\text{H}\}$  NMR (121.5 MHz,  $\text{CDCl}_3$ ) of  $[\{\text{Pd}(\text{PPh}_3)_2(4\text{-Spy})_2\}\{\text{Cu}(\text{PPh}_3)_2\text{Cl}\}_2]$  (**3**) prepared from route (i) +  $\text{PPh}_3$  in (1:2 stoichiometry) immediately.

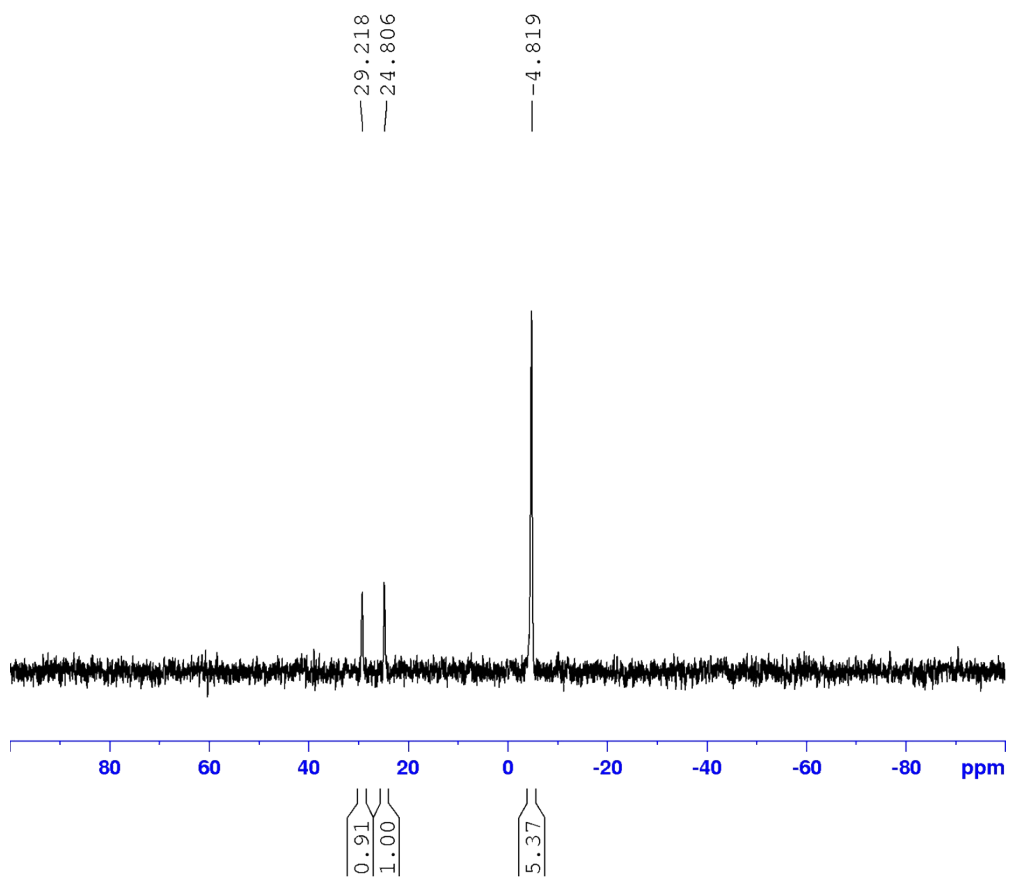

**Fig. S26**  $^{31}\text{P}\{^1\text{H}\}$  NMR (121.5 MHz,  $\text{CDCl}_3$ ) of [ $\{\text{Pd}(\text{PPh}_3)_2(4\text{-Spy})_2\} \{\text{Cu}(\text{PPh}_3)_2\text{Cl}\}_2$ ] (**3**) prepared from route (i) +  $\text{PPh}_3$  in (1:2 stoichiometry) after 2 days.

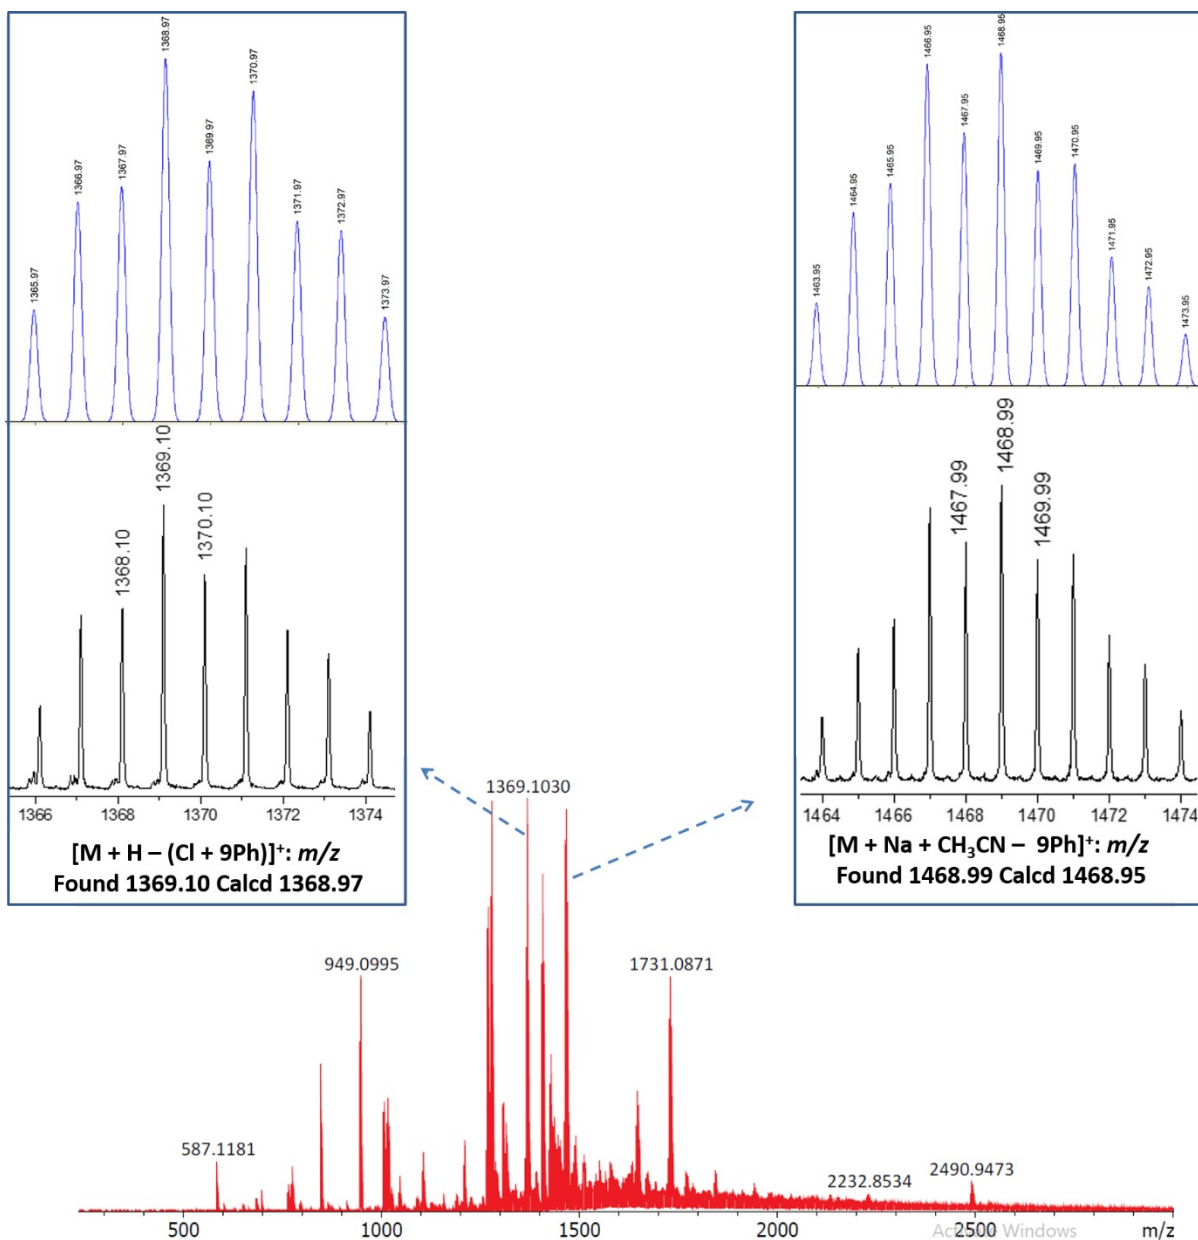

**Fig. S27** ESI-mass spectrum of  $[\{Pd(PPh_3)_2(4-Spy)_2\}\{Cu(PPh_3)_2Cl\}_2]$  (**3**). The insets show the experimentally obtained (below) isotope patterns of the fragments with those simulated (above) on the basis of natural isotope abundances. The found and calcd values are for the most abundant peak of ion.

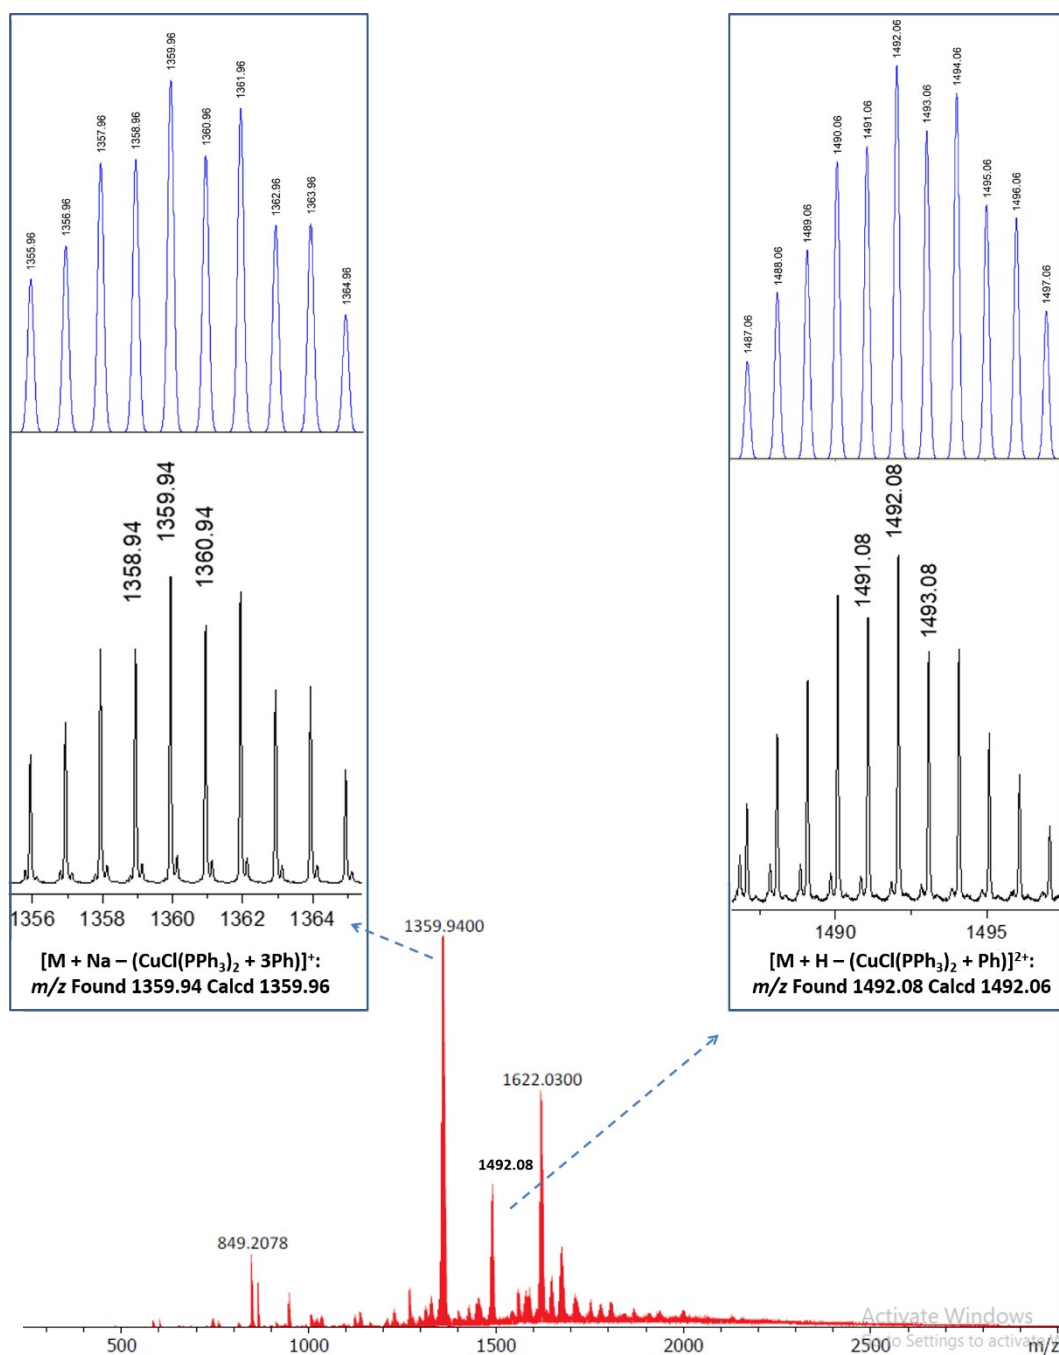

**Fig. S28** ESI-mass spectrum of  $[\{Pd(PPh_3)_2(4\text{-Sepy})_2\}\{Cu(PPh_3)_2Cl\}_2]$  (**4**). The insets show the experimentally obtained (below) isotope patterns of the fragments with those simulated (above) on the basis of natural isotope abundances. The found and calcd values are for the most abundant peak of ion.

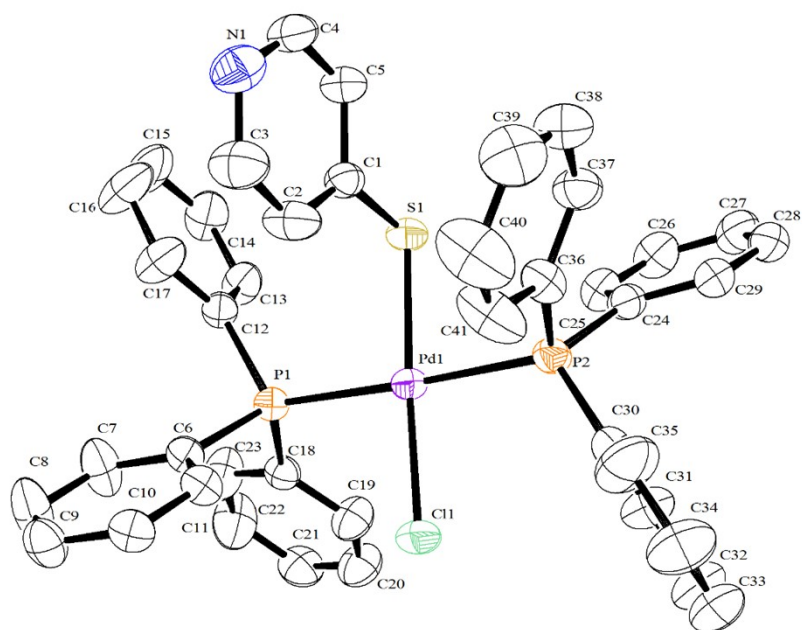

**Fig. S29** ORTEP diagram of [PdCl(4-Spy)(PPh<sub>3</sub>)<sub>2</sub>] (**1a**) ellipsoids drawn at 50% probability. The hydrogen atoms are omitted for clarity.

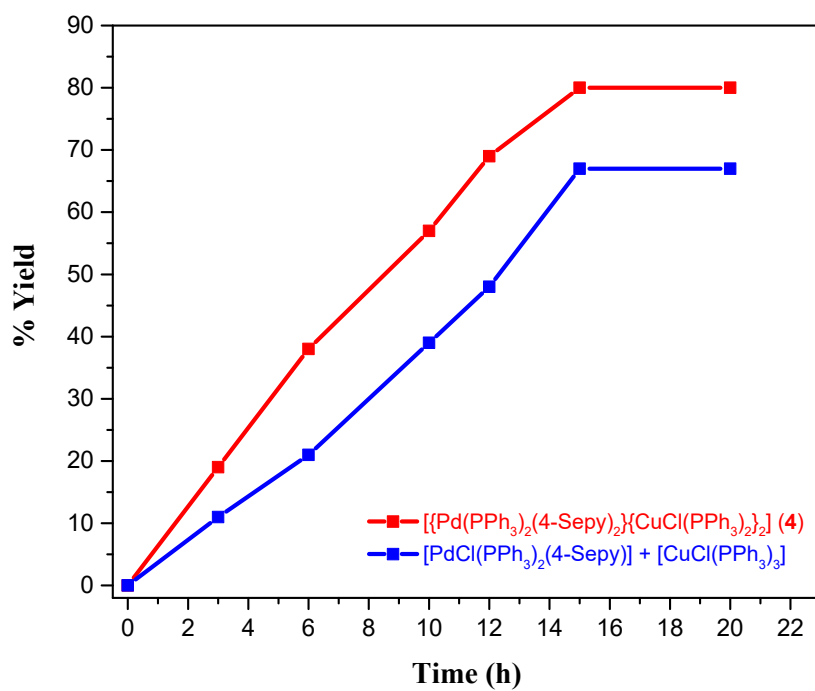

**Fig. S30** Kinetic study of catalysis reaction using catalysts  $[\{\text{Pd}(\text{PPh}_3)_2(4\text{-Sepy})_2\}\{\text{Cu}(\text{PPh}_3)_2\text{Cl}\}_2]$  (**4**) and mixture of **1b** with  $[\text{CuCl}(\text{PPh}_3)_3]$ .

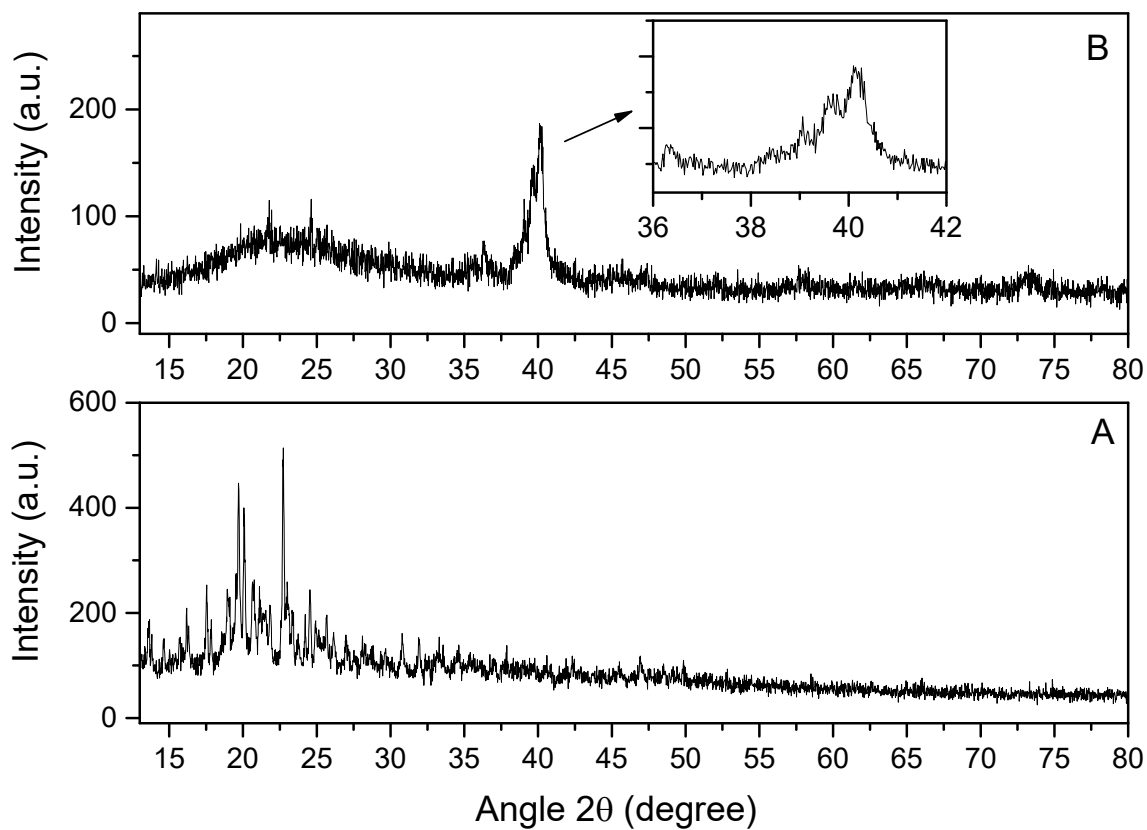

**Fig. S31** Powder XRD pattern of (A)  $[\{\text{Pd}(\text{PPh}_3)_2(4\text{-Sepy})_2\}\{\text{Cu}(\text{PPh}_3)_2\text{Cl}\}_2]$  (**4**) before catalysis experiment and (B) black residue obtained after catalysis experiment.

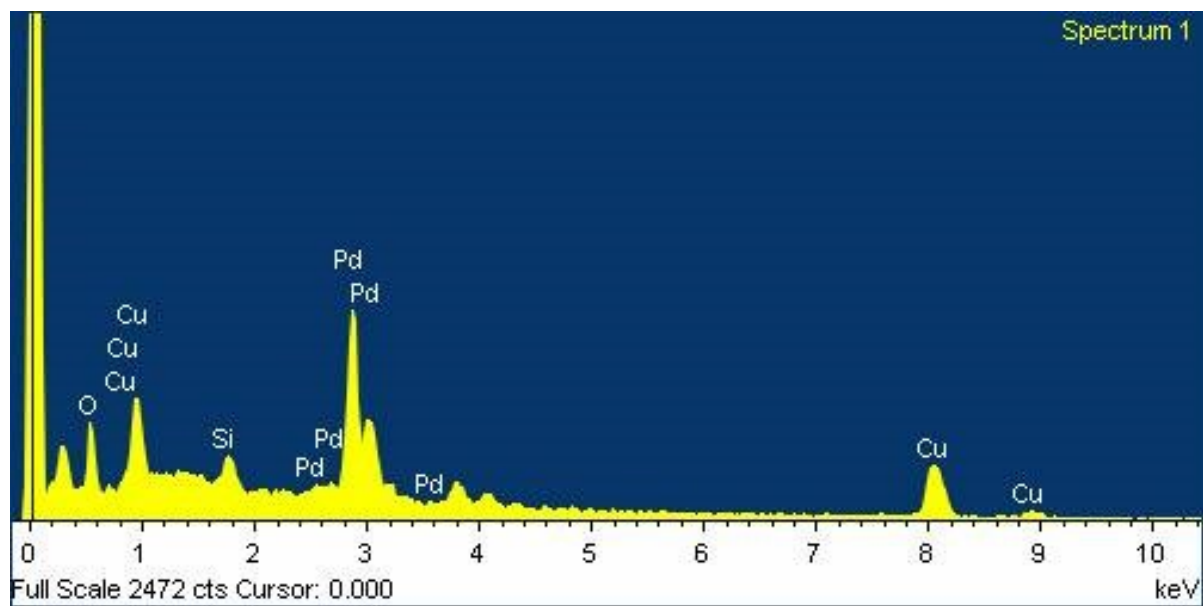

**Fig. S32** Energy Dispersive X-ray Analysis (EDAX) spectrum of the black residue obtained after catalysis experiment of  $[\{\text{Pd}(\text{PPh}_3)_2(4\text{-Sepy})_2\} \{\text{Cu}(\text{PPh}_3)_2\text{Cl}\}_2]$  (**4**).



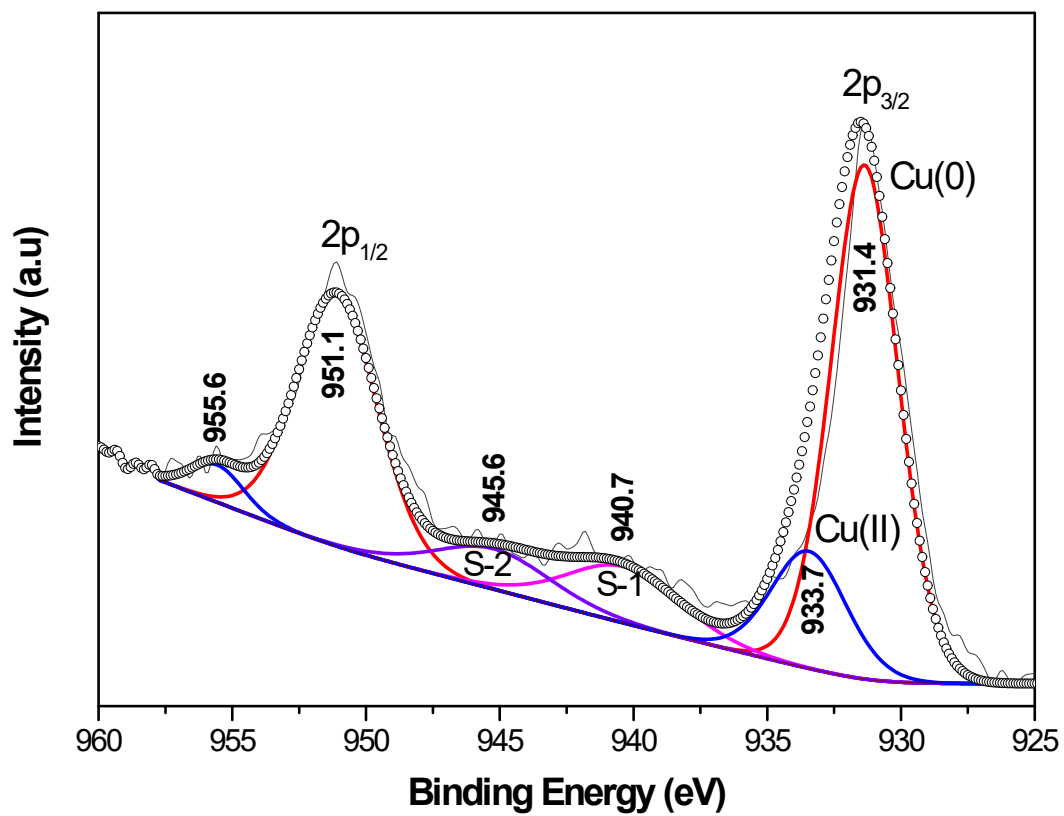

**Fig. S33** XPS spectrum of the black residue obtained after catalysis experiment of **4** displaying only the Cu 2p doublet.

**4-(phenylethynyl)acetophenone:**  $^1\text{H}$  NMR (300 MHz,  $\text{CDCl}_3$ )  $\delta$  ppm: 2.62 (s, 3H,  $\text{COCH}_3$ ), 7.38 (br, 3H), 7.56 (br, 2H), 7.61 (d, 7.8 Hz, 2H), 7.94 (d, 7.5 Hz, 2H).  $^{13}\text{C}\{^1\text{H}\}$  NMR (75 MHz,  $\text{CDCl}_3$ )  $\delta$  ppm: 26.6( $\text{CH}_3$ ), 88.6, 92.7, 122.7, 128.2, 128.3, 128.4, 128.8, 131.6, 131.7, 136.2, 197.3( $\text{C}=\text{O}$ ).

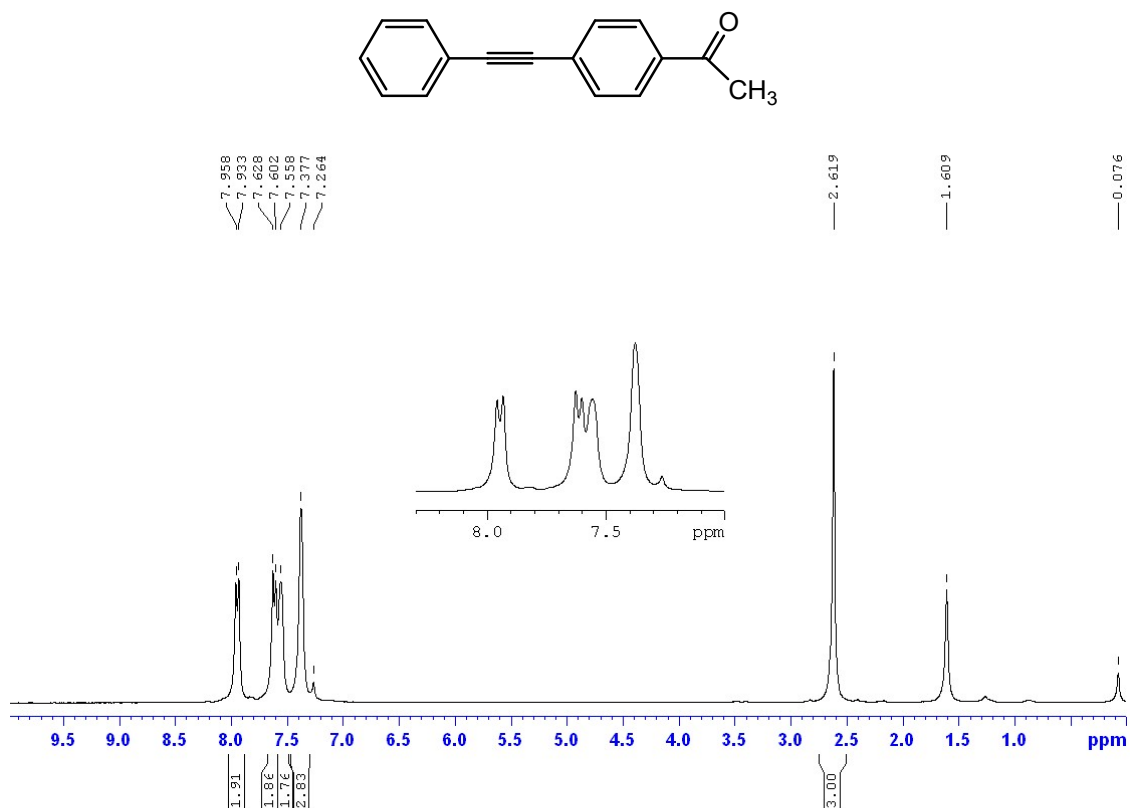

**Fig. S34**  $^1\text{H}$  NMR (300 MHz,  $\text{CDCl}_3$ ) of 4-(phenylethynyl)acetophenone.

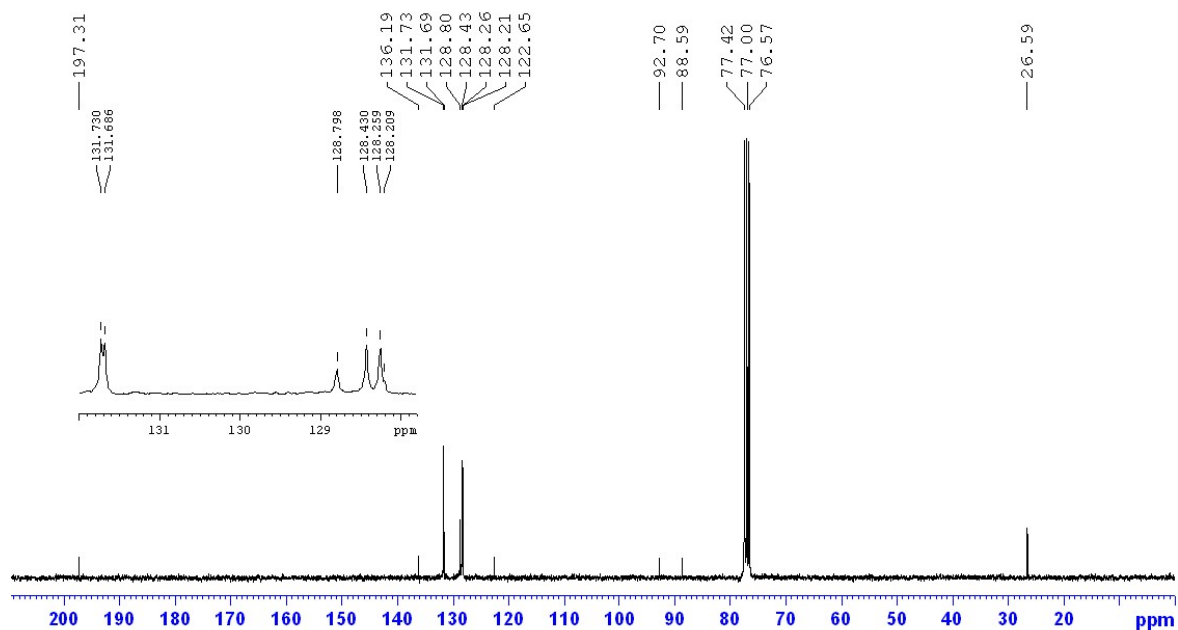

**Fig. S35**  $^{13}\text{C}\{^1\text{H}\}$  NMR (75 MHz,  $\text{CDCl}_3$ ) of 4-(phenylethynyl)acetophenone.

**4-(phenylethynyl)benzaldehyde:**  $^1\text{H}$  NMR (300 MHz,  $\text{CDCl}_3$ )  $\delta$  ppm: 7.38-7.39 (m, 3H), 7.56-7.57 (m, 2H), 7.67 (d, 7.8 Hz, 2H), 7.87 (d, 8.1 Hz, 2H), 10.02 (s, 1H, CHO).  $^{13}\text{C}\{^1\text{H}\}$  NMR (75 MHz,  $\text{CDCl}_3$ )  $\delta$  ppm: 88.5, 93.4, 122.5, 128.5, 128.9, 129.6, 131.8, 132.1, 135.4, 191.4(C=O).

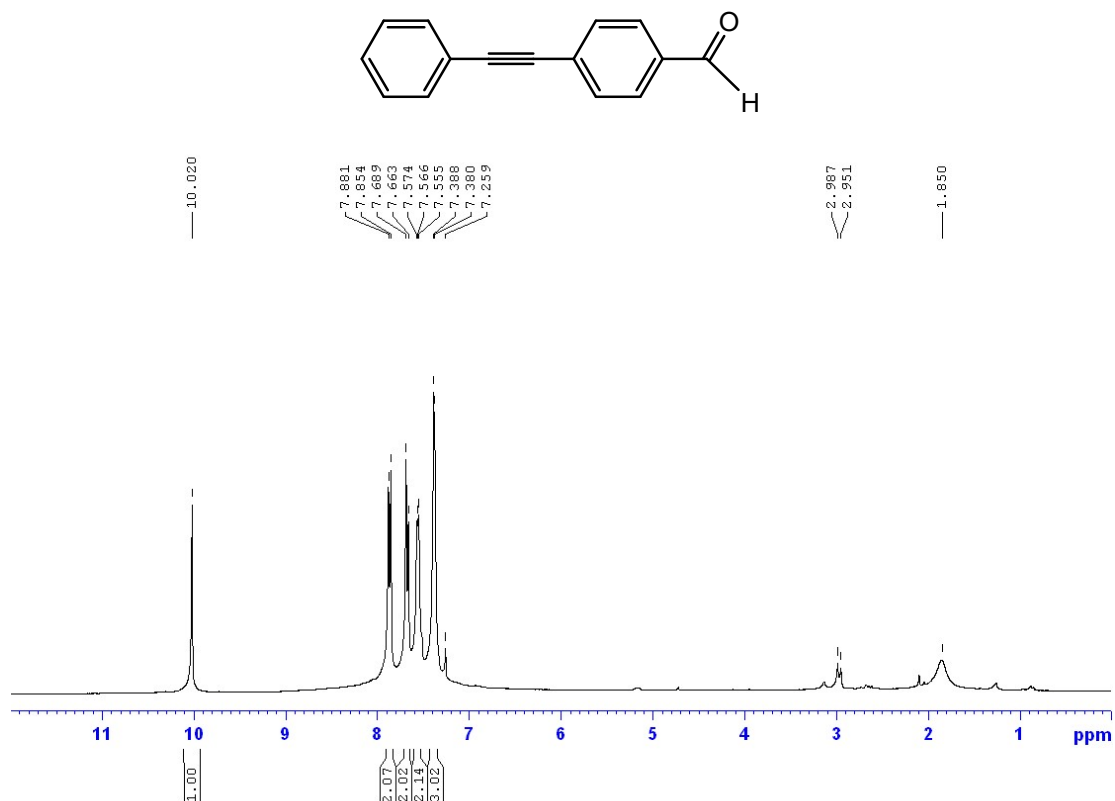

**Fig. S36**  $^1\text{H}$  NMR (300 MHz,  $\text{CDCl}_3$ ) of 4-(phenylethynyl)benzaldehyde.

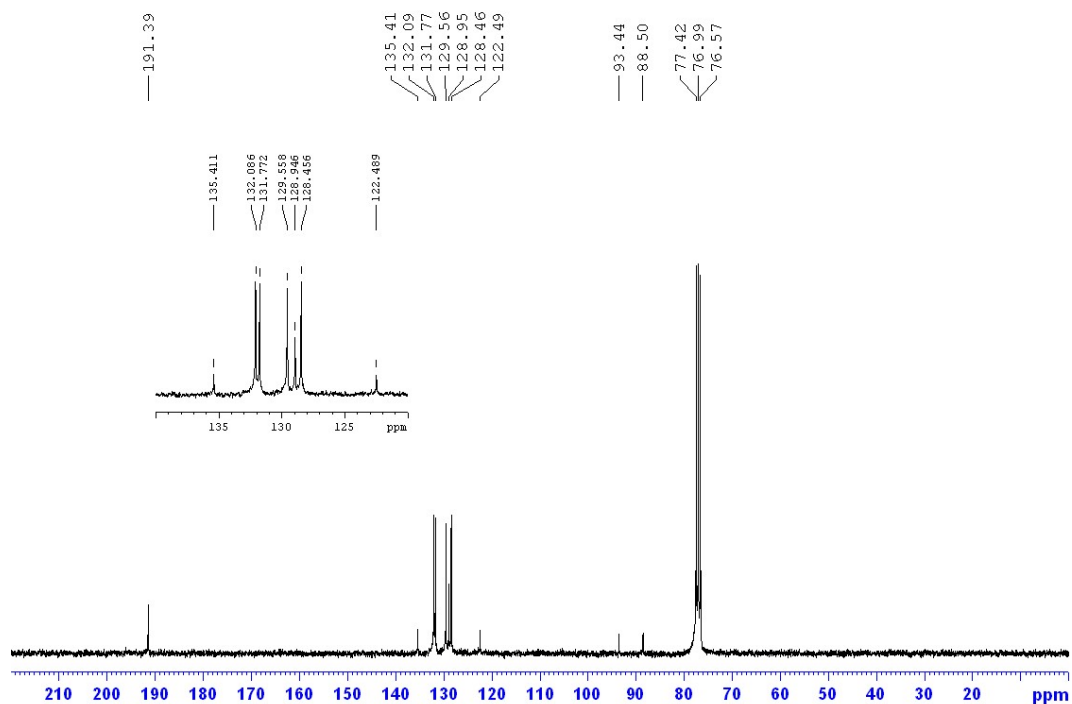

**Fig. S37**  $^{13}\text{C}\{^1\text{H}\}$  NMR (75 MHz,  $\text{CDCl}_3$ ) of 4-(phenylethynyl)benzaldehyde.

**4-(phenylethynyl)benzoate:**  $^1\text{H}$  NMR (300 MHz,  $\text{CDCl}_3$ )  $\delta$  ppm: 3.91 (s, 3H,  $\text{OCH}_3$ ), 7.34 (br, 3H), 7.53 (br d, 2H), 7.58 (d, 8.4 Hz, 2H), 7.90 (d, 8.1 Hz, 2H).

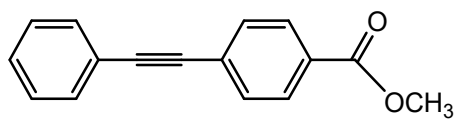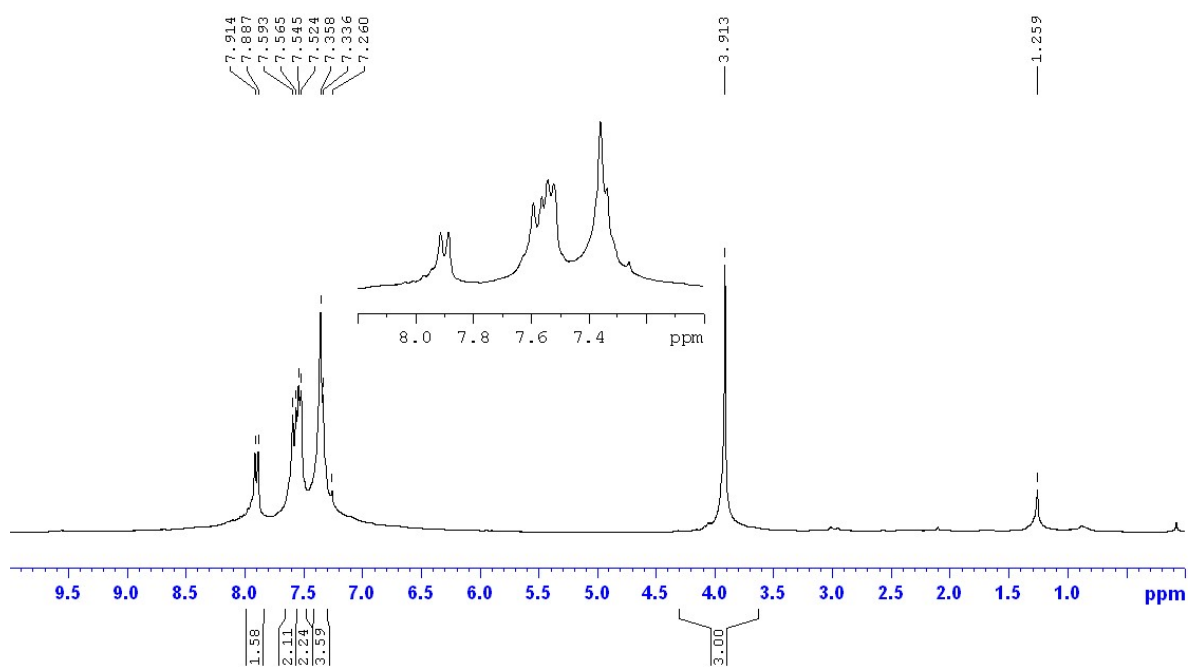

**Fig. S38**  $^1\text{H}$  NMR (300 MHz,  $\text{CDCl}_3$ ) of Methyl 4-(phenylethynyl)benzoate.

**4-(phenylethynyl)anisole:**  $^1\text{H}$  NMR (300 MHz,  $\text{CDCl}_3$ )  $\delta$  ppm: 3.78 (s, 3H,  $\text{OCH}_3$ ), 6.78 (d, 9.0 Hz, 2H), 7.34-7.40 (m, 5H), 7.54 (d, 7.5 Hz, 2H).

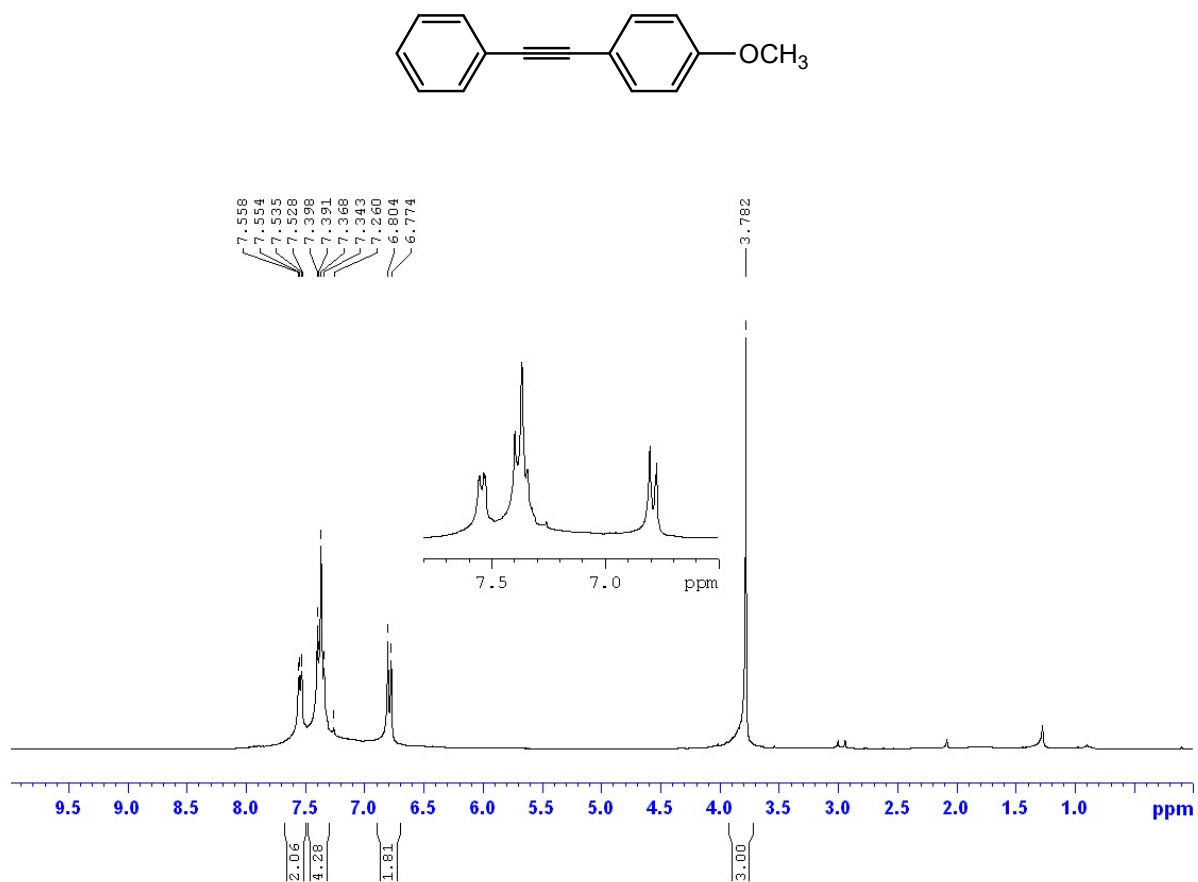

**Fig. S39**  $^1\text{H}$  NMR (300 MHz,  $\text{CDCl}_3$ ) of 4-(phenylethynyl)anisole.

**1-(phenylethynyl)-4-nitrobenzene:**  $^1\text{H}$  NMR (300 MHz,  $\text{CDCl}_3$ )  $\delta$  ppm: 7.41 (br, 3H), 7.56-7.57 (br m, 2H), 7.67 (d, 8.7 Hz, 2H), 7.22 (d, 8.4 Hz, 2H).  $^{13}\text{C}\{^1\text{H}\}$  NMR (75 MHz,  $\text{CDCl}_3$ )  $\delta$  ppm: 87.5, 94.7, 122.1, 123.6, 125.0, 128.5, 129.3, 130.3, 131.8, 132.2, 147.0.

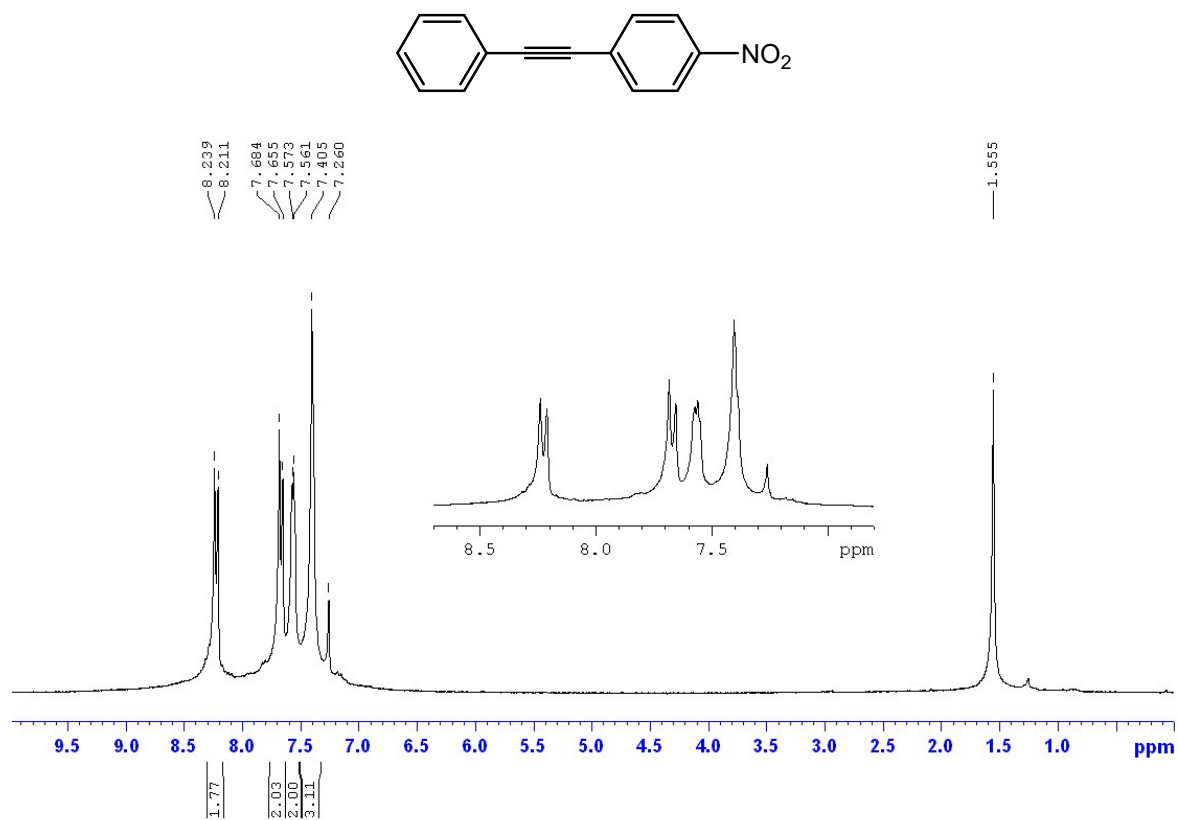

**Fig. S40**  $^1\text{H}$  NMR (300 MHz,  $\text{CDCl}_3$ ) of 1-(phenylethynyl)-4-nitrobenzene.

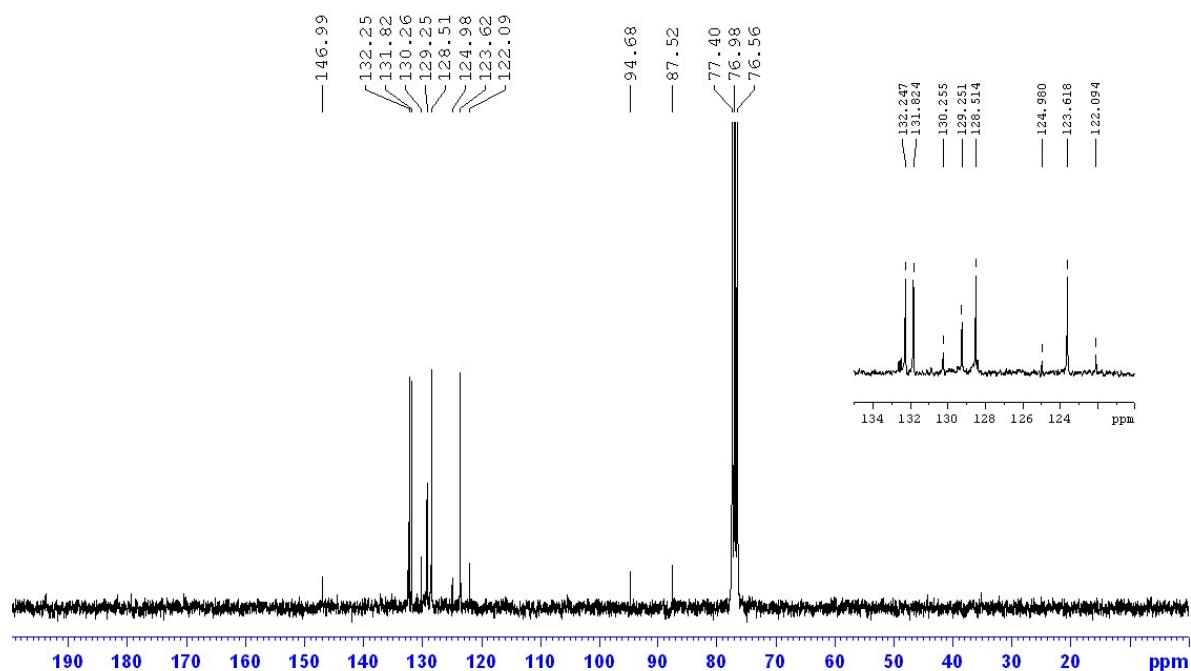

**Fig. S41**  $^{13}\text{C}\{^1\text{H}\}$  NMR (75 MHz,  $\text{CDCl}_3$ ) of 1-(phenylethynyl)-4-nitrobenzene.

**2-(2-phenylethynyl)pyridine:**  $^1\text{H}$  NMR (300 MHz,  $\text{CDCl}_3$ )  $\delta$  ppm: 7.22-7.61 (m, 1H), 7.36-7.38 (m, 3H), 7.53 (d, 7.8 Hz, 1H), 7.59-7.62 (m, 2H), 7.65-7.70 (m, 1H), 8.62 (d, 3.3 Hz, 1H).  $^{13}\text{C}\{^1\text{H}\}$  NMR (75 MHz,  $\text{CDCl}_3$ )  $\delta$  ppm: 88.6, 89.2, 122.3, 122.7, 127.1, 128.4, 128.9, 129.2, 132.0, 132.5, 136.1, 143.5, 150.0

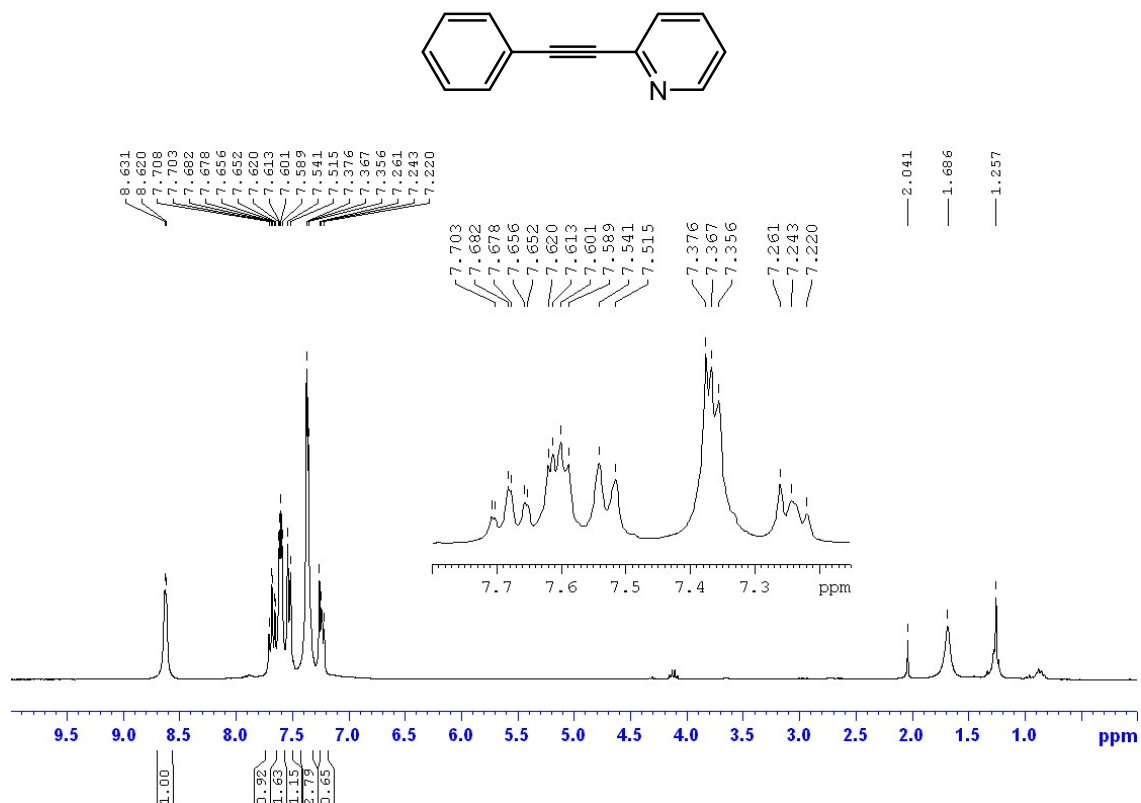

**Fig. S42**  $^1\text{H}$  NMR (300 MHz,  $\text{CDCl}_3$ ) of 2-(2-phenylethynyl)pyridine.

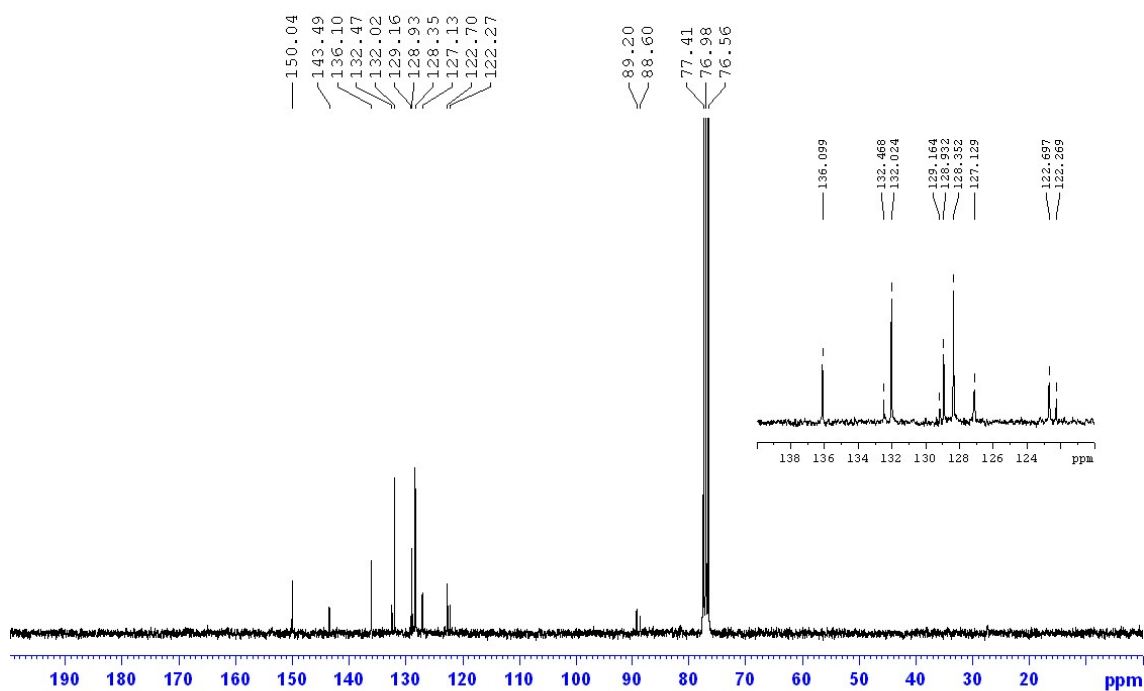

**Fig. S43**  $^{13}\text{C}\{^1\text{H}\}$  NMR (75 MHz,  $\text{CDCl}_3$ ) of 2-(2-phenylethynyl)pyridine.

**2-(phenylethynyl)thiophene:**  $^1\text{H}$  NMR (300 MHz,  $\text{CDCl}_3$ )  $\delta$  ppm: 7.01-7.04 (m, 1H), 7.29 (d, 4.5 Hz, 2H), 7.35- 7.36 (br m, 3H), 7.52-7.54 (m, 2H).  $^{13}\text{C}\{^1\text{H}\}$  NMR (75 MHz,  $\text{CDCl}_3$ )  $\delta$  ppm: 82.6, 93.0, 123.0, 123.4, 127.1, 127.2, 128.3, 128.4, 129.2, 131.4, 131.9, 132.5

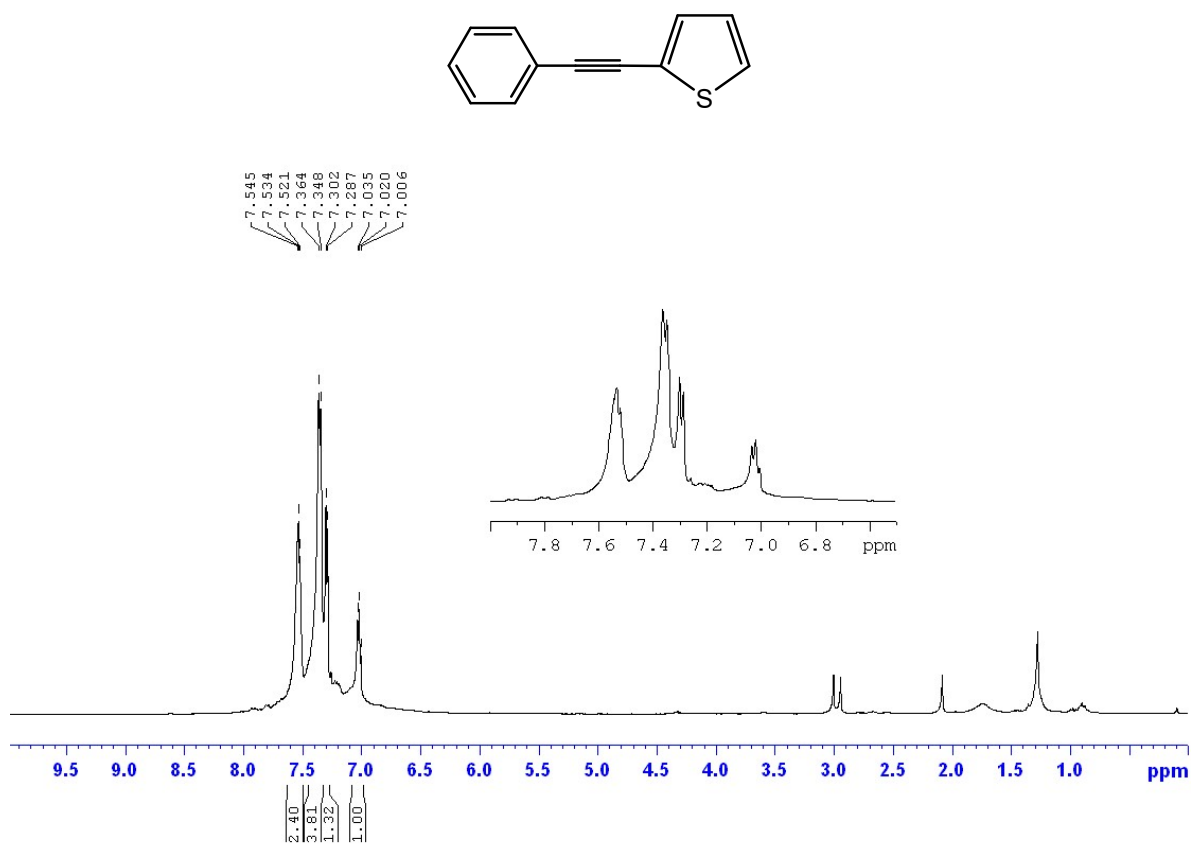

**Fig. S44**  $^1\text{H}$  NMR (300 MHz,  $\text{CDCl}_3$ ) of 2-(phenylethynyl)thiophene.

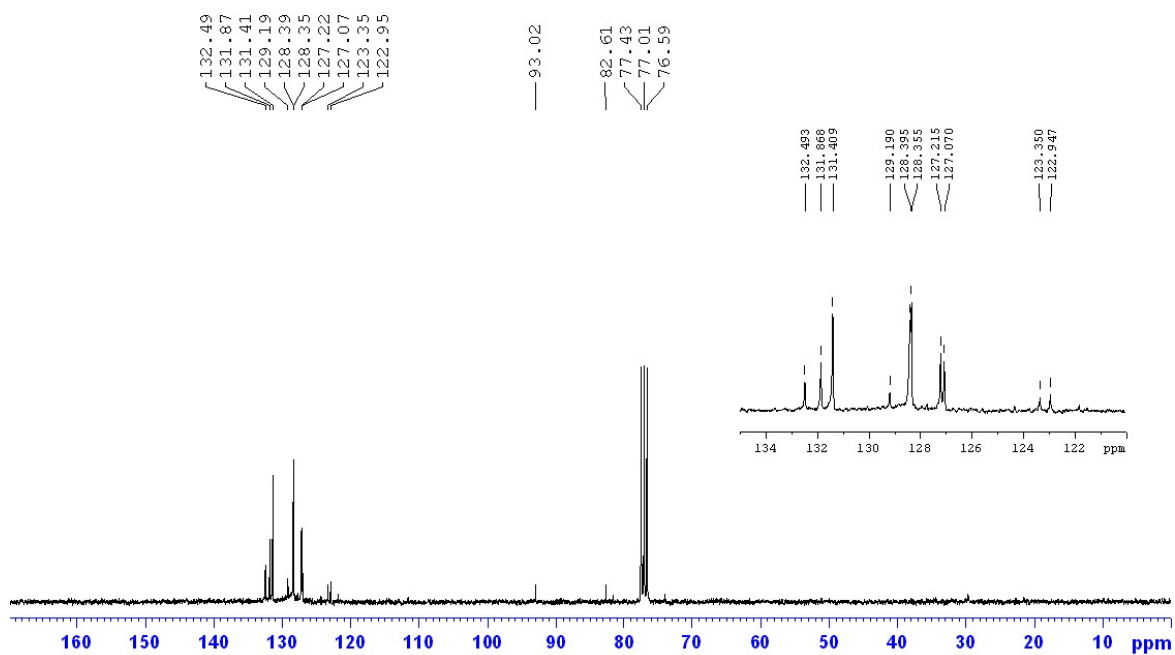

**Fig. S45**  $^{13}\text{C}\{^1\text{H}\}$  NMR (75 MHz,  $\text{CDCl}_3$ ) of 2-(phenylethynyl)thiophene.



**4-(phenylethynyl)benzonitrile:**  $^1\text{H}$  NMR (300 MHz,  $\text{CDCl}_3$ )  $\delta$  ppm: 7.38-7.39 (br m, 3H), 7.54-7.56 (m, 2H), 7.62-7.65 (m, 4H).  $^{13}\text{C}\{^1\text{H}\}$  NMR (75 MHz,  $\text{CDCl}_3$ )  $\delta$  ppm: 87.7, 93.8, 111.5, 118.5, 122.2, 128.2, 128.5, 129.1, 131.8, 132.1.

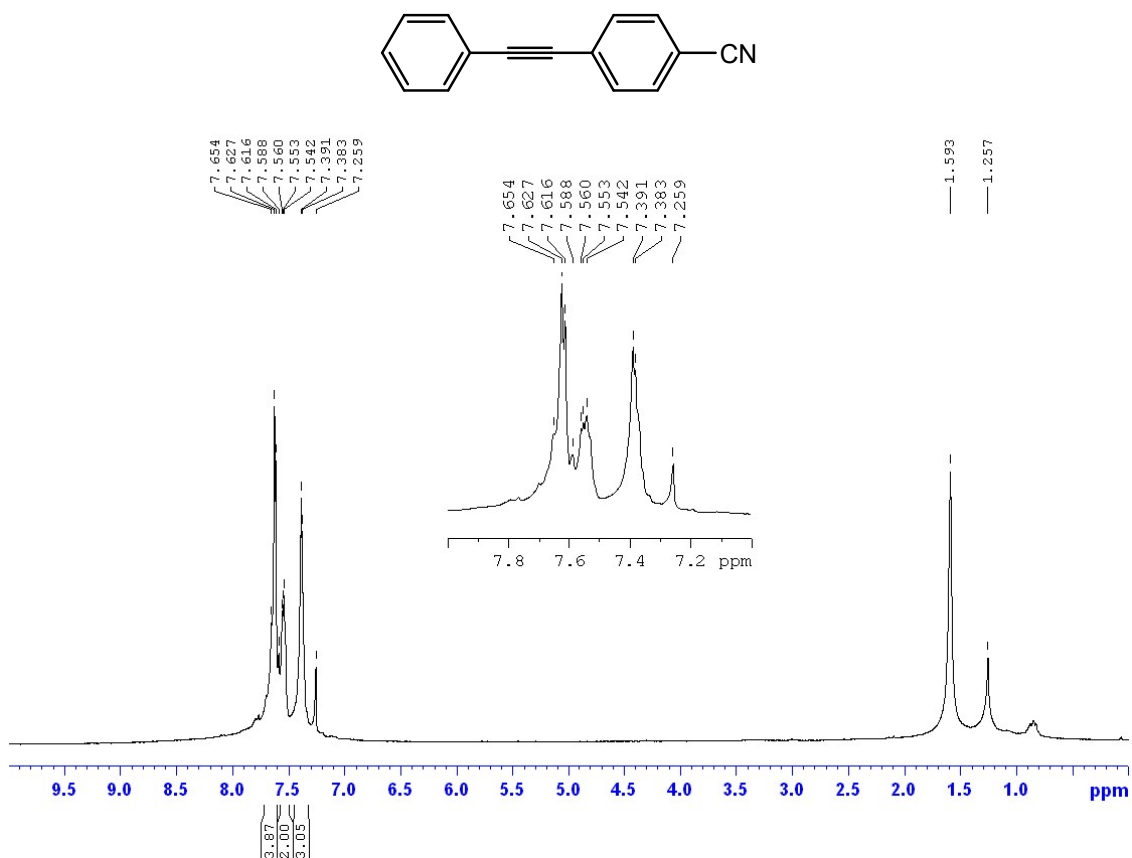

**Fig. S46**  $^1\text{H}$  NMR (300 MHz,  $\text{CDCl}_3$ ) of 4-(phenylethynyl)benzonitrile.

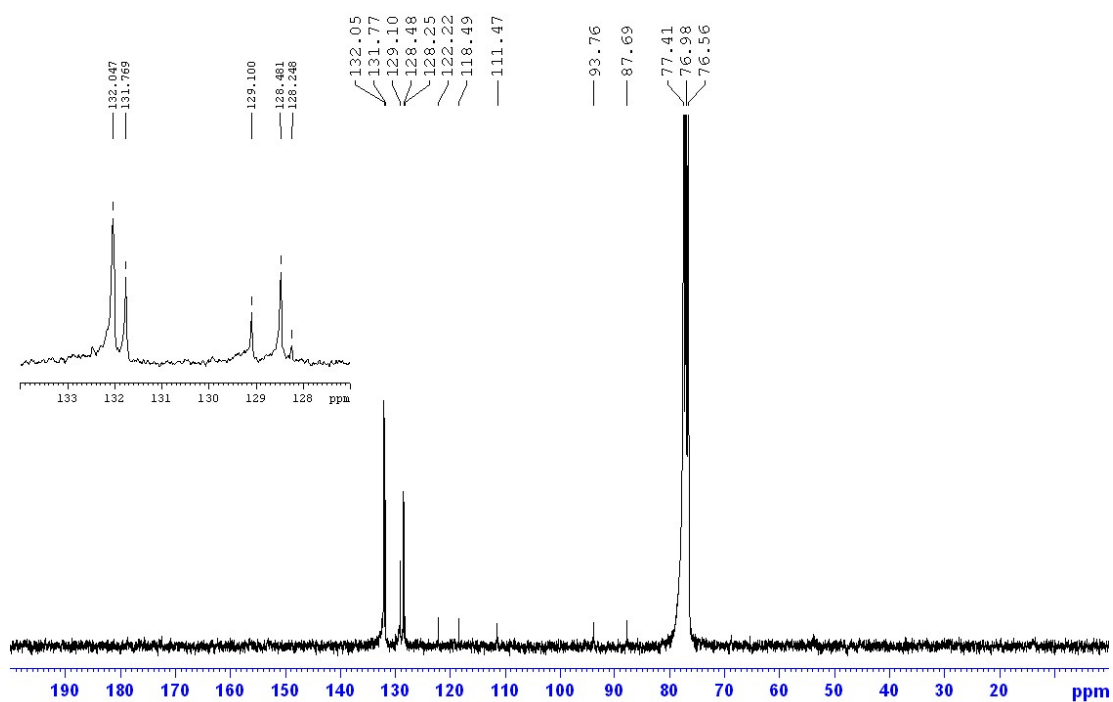

**Fig. S47**  $^{13}\text{C}\{^1\text{H}\}$  NMR (75 MHz,  $\text{CDCl}_3$ ) of 4-(phenylethynyl)benzonitrile.
